# Supplementary material for: Profiling of IgG antibodies targeting unmodified and corresponding citrullinated autoantigens in a multicenter national cohort of early arthritis in Germany
Source: PubMed Central journal article supplement (PMC7336616; doi:10.1186/s13075-020-02252-6), 2020-07-06

**A**

**Search Result Info**

| Search Result                                                                  | Location                      | Search Engine | Database                    |
|--------------------------------------------------------------------------------|-------------------------------|---------------|-----------------------------|
| POA Q Exactive SP Hsa Trypsin<br>citrullination_Mascot_2013-07-23 16:<br>51:35 | /PG548-POA/130719/QD03763.mgf | Mascot        | NCBIInr-geneid (2013-02-04) |

**Protein 1: [FGB,2244] fibrinogen beta chain isoform 1 preproprotein [Homo sapiens]**

|                                    |                                    |
|------------------------------------|------------------------------------|
| <b>Accession:</b> gij70906435      | <b>Score:</b> 615.5                |
| <b>Database:</b> NCBIInr-geneid    | <b>MW [kDa]:</b> 55.9              |
|                                    | <b>pI:</b> 9.3                     |
| <b>Modification(s):</b> Deamidated | <b>Sequence Coverage [%]:</b> 13.6 |
|                                    | <b>No. of unique Peptides:</b> 10  |

|            |             |             |             |            |            |            |            |
|------------|-------------|-------------|-------------|------------|------------|------------|------------|
| 10         | 20          | 30          | 40          | 50         | 60         | 70         | 80         |
| MKRMVSWSFH | KLKTMKHLILL | LLLCVFLVKS  | QGVNDNEEGF  | FSARGHRPLD | KKREEAPSLR | PAPPPISGGG | YRARPAKAAA |
| 90         | 100         | 110         | 120         | 130        | 140        | 150        | 160        |
| TQKKVERKAP | DAGGCLHADP  | DLGVLCPPTGC | QLQEALLQQE  | RPIRNSVDEL | NNNVEAVSQT | SSSSFQYMYL | LKDLWQKRQK |
| 170        | 180         | 190         | 200         | 210        | 220        | 230        | 240        |
| QVKDNENVVN | EYSSELEKHQ  | LYIDETVNSN  | IPTNLRVLR   | ILENLRSKI  | Q          | KLESDVSAQM | EYCRTPTVTS |
| 250        | 260         | 270         | 280         | 290        | 300        | 310        | 320        |
| CEEIIRKGGE | TSEMYLIQPD  | SSVKPYRVYC  | DMNTFENGWWT | VIQNRQDGSV | DFGRKWDPYK | QGFGNVATNT | DGKNYCGLPG |
| 330        | 340         | 350         | 360         | 370        | 380        | 390        | 400        |
| EYWLGNLKL  | QLTRMGPTLE  | LIEMEDWKG   | KVKAHYGGFT  | VQNEANKYQI | SVNKYRGTAG | NALMDGASQL | MGENRMTTTH |
| 410        | 420         | 430         | 440         | 450        | 460        | 470        | 480        |
| NGMFFSTYDR | DNDGWLTSDF  | RKQCSKEDGG  | GWYVNRCHAA  | NPNGRYWGG  | QYTWDMARKH | TDDGVVVMNW | KGSWYSMRKM |
| 490        | 500         |             |             |            |            |            |            |
| SMKIRPFPPQ | Q           |             |             |            |            |            |            |

| Cmpd. | No. of Cmpds. | m/z meas. | Δ m/z [ppm] | z | Rt [min] | Score | P | Range   | Sequence                                    | Modification      |
|-------|---------------|-----------|-------------|---|----------|-------|---|---------|---------------------------------------------|-------------------|
| 596   | 3             | 1058.7733 | -0.65       | 4 | 14.8     | 81.8  | 2 | 161-196 | K.QVKDNENVVNEYSSLEKHQLYIDETVNSNIPTNLR.V     |                   |
| 691   | 1             | 821.0677  | -0.53       | 5 | 15.3     | 20.0  | 3 | 161-196 | K.QVKDNENVVNEYSSLEKHQLYIDETVNSNIPTNLR.VLR.S | Deamidated: 36    |
| 719   | 3             | 1262.9548 | -0.80       | 3 | 15.4     | 123.6 | 1 | 164-196 | K.DNENVVNEYSSLEKHQLYIDETVNSNIPTNLR.V        |                   |
| 782   | 2             | 1062.2760 | -1.81       | 4 | 15.8     | 36.6  | 2 | 164-196 | K.DNENVVNEYSSLEKHQLYIDETVNSNIPTNLR.VLR.S    | Deamidated: 33    |
| 479   | 2             | 709.6992  | 0.01        | 3 | 14.1     | 89.7  | 0 | 179-196 | K.HQLYIDETVNSNIPTNLR.V                      |                   |
| 625   | 1             | 832.7768  | -2.10       | 3 | 14.9     | 49.2  | 1 | 179-196 | K.HQLYIDETVNSNIPTNLR.VLR.S                  | Deamidated: 18    |
| 623   | 2             | 405.2464  | -1.43       | 3 | 14.9     | 31.5  | 1 | 197-206 | R.VLRSILENLR.S                              | Deamidated: 3     |
| 648   | 1             | 715.4224  | 0.10        | 2 | 15.1     | 39.2  | 2 | 197-206 | R.VLRSILENLR.SKI                            | Deamidated: 3, 10 |
| 422   | 1             | 422.7479  | -0.30       | 2 | 13.8     | 42.5  | 0 | 200-206 | R.SILENLR.S                                 |                   |
| 674   | 2             | 740.3755  | 1.47        | 3 | 15.2     | 104.4 | 2 | 335-353 | R.MGPTLEIEMEDWKGDKVK.A                      |                   |

**B**

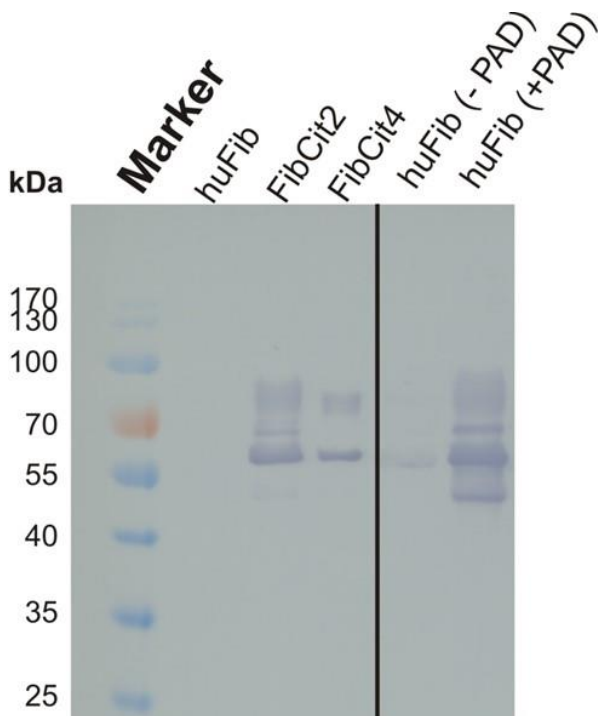

- neg. control: huFib
- pos. control: FibCit2 & FibCit4
- Anti-citrullinated-fibrinogen antibody: mouse-anti-citrullinated fibrinogen (α-FibC)

C

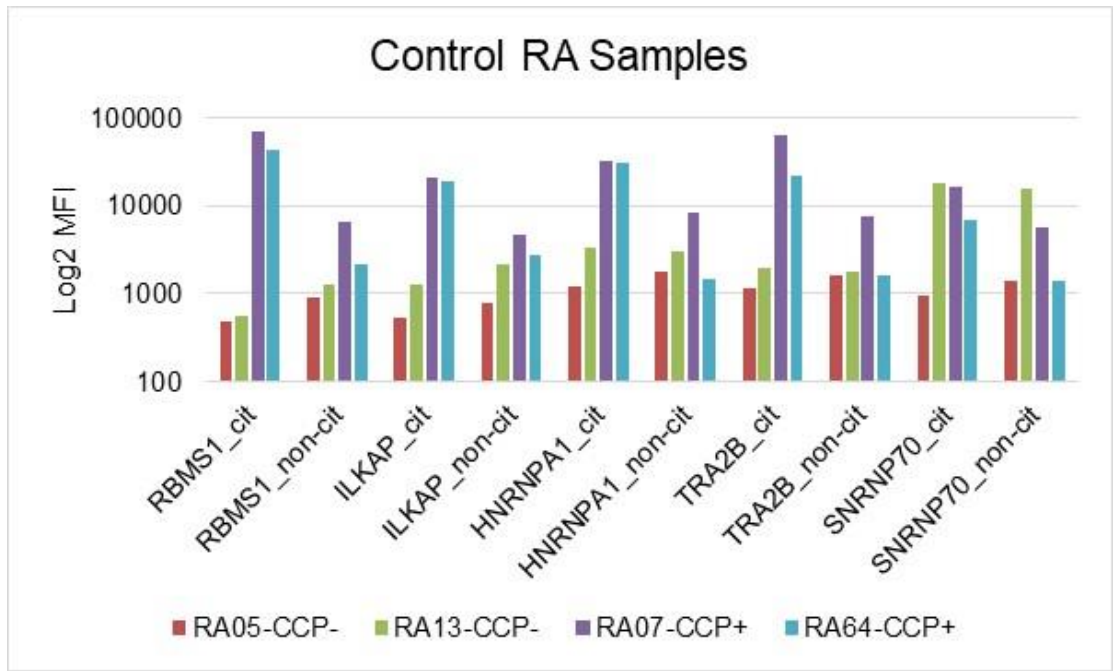

Supplement: 13075_2020_2252_MOESM2_ESM.pdf [file 13075_2020_2252_MOESM2_ESM.pdf]
