# Supplementary material for: Profiling of IgG antibodies targeting unmodified and corresponding citrullinated autoantigens in a multicenter national cohort of early arthritis in Germany
Source: PubMed Central journal article supplement (PMC7336616; doi:10.1186/s13075-020-02252-6), 2020-07-06
Supplement: 13075_2020_2252_MOESM1_ESM.pdf [file 13075_2020_2252_MOESM1_ESM.pdf]

| Gene Symbol | Gene ID   | Gene name                                                                               | uncitrullinated |        |         |         |         |            |            | citrullinated   |        |         |         |         |      |            | Biological Pathway (GO-Term) |
|-------------|-----------|-----------------------------------------------------------------------------------------|-----------------|--------|---------|---------|---------|------------|------------|-----------------|--------|---------|---------|---------|------|------------|------------------------------|
|             |           |                                                                                         | Sens (90% Spec) | 2.5-Cl | 97.5-Cl | pos (n) | pos (%) | Sens (opt) | Spec (opt) | Sens (90% Spec) | 2.5-Cl | 97.5-Cl | pos (n) | pos (%) | Sens | Spec (opt) |                              |
| ABI2        | 10152     | abl interactor 2(ABI2)                                                                  | 12              | 6.1    | 24.9    | 198     | 64.1    | 64.1       | 46.1       | 16.2            | 7.8    | 32.4    | 172     | 55.7    | 55.7 | 63.7       | cytoskeleton organization    |
| ACTB        | 60        | actin beta(ACTB)                                                                        | 6.5             | 1.6    | 14.9    | 113     | 36.6    | 36.6       | 71.6       | 14.9            | 2.6    | 25.2    | 178     | 57.6    | 57.6 | 57.8       | immune system process        |
| ADAMTS13    | 11093     | ADAM metalloproteinase with thrombospondin type 1 motif 13(ADAMTS13)                    | 8.4             | 2.3    | 16.8    | 91      | 29.4    | 29.4       | 76.5       | 12.6            | 6.5    | 27.5    | 153     | 49.5    | 49.5 | 61.8       | immune system process        |
| AEBP1       | 165       | AE binding protein 1(AEBP1)                                                             | 12.1            | 4      | 19.5    | 112     | 36.2    | 33.9       | 76         | 24.6            | 13.6   | 36.6    | 158     | 51.1    | 51.1 | 70.6       | proteolysis                  |
| AKT1        | 207       | AKT serine/threonine kinase 1(AKT1)                                                     | 14.2            | 9.4    | 19.1    | 48      | 15.5    | 84.5       | 27.5       | 9.4             | 1.6    | 20.7    | 141     | 45.6    | 45.6 | 63.7       | inflammatory response        |
| ALAS1       | 211       | 5'-aminolevulinatase synthase 1(ALAS1)                                                  | 9.4             | 4.5    | 20.7    | 119     | 38.5    | 61.5       | 52         | 8.7             | 4.9    | 18.5    | 117     | 37.9    | 62.1 | 49         | muscle                       |
| ANKRD16     | 54522     | ankyrin repeat domain 16(ANKRD16)                                                       | 10              | 5.2    | 19.1    | 102     | 33      | 33         | 72.5       | 12              | 4.5    | 22.3    | 103     | 33.3    | 33.3 | 79.4       | eye                          |
| ANKS6       | 203286    | ankyrin repeat and sterile alpha motif domain containing 6(ANKS6)                       | 10.4            | 3.9    | 18.4    | 210     | 68      | 68         | 36.3       | 14.6            | 9.1    | 22      | 272     | 88      | 12   | 94.1       | skin                         |
| AP2A2       | 161       | adaptor related protein complex 2 alpha 2 subunit(AP2A2)                                | 7.4             | 2.9    | 15.9    | 187     | 60.5    | 60.5       | 48         | 17.2            | 2.8    | 27.8    | 114     | 36.9    | 36.9 | 75.5       | immune system process        |
| APBB1P      | 54518     | amyloid beta precursor protein binding family B member 1 interacting protein(APBB1P)    | 11              | 6.1    | 15.9    | 217     | 70.2    | 70.2       | 34.3       | 11              | 5.2    | 18.1    | 219     | 70.9    | 70.9 | 41.2       | immune system process        |
| APOE        | 348       | apolipoprotein E(APOE)                                                                  | 17.8            | 9.7    | 28.5    | 227     | 73.5    | 26.5       | 84.3       | 17.2            | 12     | 24.6    | 272     | 88      | 12   | 97.1       | inflammatory response        |
| APP         | 351       | amyloid beta precursor protein(APP)                                                     | 9.4             | 4.2    | 17.8    | 143     | 46.3    | 53.7       | 51         | 10              | 3.9    | 15      | 133     | 43      | 57   | 47.1       | immune system process        |
| ARF1        | 375       | ADP ribosylation factor 1(ARF1)                                                         | 12.6            | 5.8    | 20.7    | 226     | 73.1    | 26.9       | 78.4       | 9.7             | 4.9    | 17.5    | 200     | 64.7    | 64.7 | 44.1       | immune system process        |
| ARHGAP32    | 9743      | Rho GTPase activating protein 32(ARHGAP32)                                              | 16.6            | 7.8    | 26.9    | 137     | 44.3    | 55.7       | 54.9       | 14.2            | 8.1    | 20.7    | 137     | 44.3    | 55.7 | 57.8       | eye                          |
| ARL8A       | 127829    | ADP ribosylation factor like GTPase 8A(ARL8A)                                           | 19.4            | 7.1    | 26.9    | 244     | 79      | 21         | 90.2       | 19.1            | 10.7   | 33.3    | 86      | 27.8    | 27.8 | 88.2       | extracellular exosome        |
| ARPP21      | 10777     | cAMP regulated phosphoprotein 21(ARPP21)                                                | 16.2            | 11.3   | 24.9    | 198     | 64.1    | 35.9       | 73.5       | 15.2            | 9.7    | 20.4    | 173     | 56      | 44   | 64.7       | lung                         |
| ARRB2       | 409       | arrestin beta 2(ARRB2)                                                                  | 8.7             | 2.9    | 18.8    | 100     | 32.4    | 32.4       | 71.6       | 19.4            | 3.9    | 36.6    | 103     | 33.3    | 33.3 | 86.3       | immune system process        |
| ASMTL       | 8623      | acetylserotonin O-methyltransferase-like(ASMTL)                                         | 10.4            | 4.5    | 18.8    | 177     | 57.3    | 57.3       | 52.9       | 36.2            | 27.2   | 45      | 122     | 39.5    | 39.5 | 88.2       | fibroblast                   |
| ASNS        | 440       | asparagine synthetase (glutamine-hydrolyzing)(ASNS)                                     | 12.8            | 6.5    | 23.6    | 245     | 79.3    | 20.7       | 85.3       | 11              | 6.1    | 19.1    | 164     | 53.1    | 53.1 | 54.9       | apoptotic process            |
| ASPSR1      | 79058     | ASPSR1, UBX domain containing tether for SLC2A4(ASPSR1)                                 | 15.9            | 4.2    | 24.6    | 228     | 73.8    | 73.8       | 43.1       | 15.5            | 4.2    | 25.9    | 130     | 42.1    | 42.1 | 75.5       | eye                          |
| ATF5        | 22809     | activating transcription factor 5(ATF5)                                                 | 14.9            | 4.9    | 26.9    | 157     | 50.8    | 50.8       | 62.7       | 22              | 15.2   | 36.9    | 149     | 48.2    | 48.2 | 79.4       | apoptotic process            |
| ATIC        | 471       | 5-aminimidazole-4-carboxamide ribonucleotide formyltransferase/IMP cyclohydrolase(ATIC) | 13.6            | 6.5    | 22      | 188     | 60.8    | 60.8       | 47.1       | 18.8            | 6.8    | 25.9    | 114     | 36.9    | 36.9 | 75.5       | extracellular exosome        |
| B2M         | 567       | beta-2-microglobulin(B2M)                                                               | 11.3            | 5.5    | 21      | 127     | 41.1    | 41.1       | 67.6       | 20.5            | 14.6   | 26.9    | 111     | 35.9    | 35.9 | 78.4       | immune system process        |
| BAG5        | 9529      | BCL2 associated athanogene 5(BAG5)                                                      | 11.7            | 1.6    | 20.7    | 132     | 42.7    | 42.7       | 62.7       | 19.4            | 5.8    | 30.4    | 139     | 45      | 45   | 73.5       | apoptotic process            |
| BCKDK       | 10295     | branched chain ketoacid dehydrogenase kinase(BCKDK)                                     | 12.3            | 5.2    | 18.8    | 129     | 41.7    | 41.7       | 64.7       | 17.2            | 7.1    | 30.4    | 119     | 38.5    | 38.5 | 78.4       | lung                         |
| BCL10       | 8915      | B-cell CLL/lymphoma 10(BCL10)                                                           | 10.4            | 6.5    | 18.1    | 129     | 41.7    | 58.3       | 51         | 10              | 3.9    | 24.3    | 194     | 62.8    | 62.8 | 45.1       | immune system process        |
| BCL11B      | 64919     | B-cell CLL/lymphoma 11B(BCL11B)                                                         | 10.4            | 6.1    | 17.5    | 227     | 73.5    | 73.5       | 35.3       | 19.1            | 12.6   | 25.9    | 200     | 64.7    | 64.7 | 51         | immune system process        |
| BCL11B      | 64919     | B-cell CLL/lymphoma 11B(BCL11B)                                                         | 15.2            | 10     | 23      | 70      | 22.7    | 77.3       | 32.4       | 10.7            | 2.3    | 16.5    | 213     | 68.9    | 68.9 | 35.3       | immune system process        |
| BGN         | 633       | biglycan(BGN)                                                                           | 12.3            | 3.6    | 22.3    | 178     | 57.6    | 57.6       | 50         | 19.1            | 11.7   | 26.5    | 162     | 52.4    | 52.4 | 58.8       | skin                         |
| BICD2       | 23299     | BICD cargo adaptor 2(BICD2)                                                             | 16.2            | 10     | 21.7    | 240     | 77.7    | 77.7       | 36.3       | 22.3            | 15.2   | 30.4    | 197     | 63.8    | 63.8 | 57.8       | cytoskeleton organization    |
| BIRC5       | 332       | baculoviral IAP repeat containing 5(BIRC5)                                              | 10.7            | 4.2    | 21      | 189     | 61.2    | 61.2       | 49         | 16.2            | 8.1    | 25.9    | 149     | 48.2    | 48.2 | 64.7       | apoptotic process            |
| BMPR2       | 659       | bone morphogenetic protein receptor type 2(BMPR2)                                       | 9.7             | 3.9    | 20.1    | 104     | 33.7    | 66.3       | 41.2       | 8.7             | 4.2    | 16.3    | 104     | 33.7    | 66.3 | 40.2       | apoptotic process            |
| c11orf1     | 64776     | chromosome 11 open reading frame 1(C11orf1)                                             | 11.7            | 4.2    | 23.3    | 116     | 37.5    | 62.5       | 45.1       | 8.4             | 4.2    | 25.9    | 125     | 40.5    | 40.5 | 71.6       | lung                         |
| c18orf21    | 83608     | chromosome 18 open reading frame 21(C18orf21)                                           | 9.8             | 2.3    | 21.7    | 128     | 41.4    | 41.4       | 68.6       | 15.2            | 8.7    | 23.5    | 105     | 34      | 34   | 72.5       | bone                         |
| C1orf131    | 128061    | chromosome 1 open reading frame 131(C1orf131)                                           | 13.6            | 7.4    | 20.4    | 33      | 10.7    | 89.3       | 16.7       | 17.5            | 7.1    | 25.6    | 144     | 46.6    | 46.6 | 66.7       | eye                          |
| C1QA        | 712       | complement C1q A chain(C1QA)                                                            | 7.1             | 2.3    | 16.8    | 164     | 53.1    | 53.1       | 53.9       | 15.5            | 5.5    | 26.2    | 116     | 37.5    | 37.5 | 78.4       | immune system process        |
| c21orf91    | 54149     | chromosome 21 open reading frame 91(C21orf91)                                           | 13.6            | 6.1    | 19.1    | 182     | 58.9    | 41.1       | 65.7       | 25.9            | 20.1   | 33      | 71      | 23      | 23   | 95.1       | skin                         |
| CACNA1H     | 8912      | calcium voltage-gated channel subunit alpha1 H(CACNA1H)                                 | 18.4            | 9.4    | 24.9    | 80      | 25.9    | 74.1       | 36.3       | 15.2            | 9.1    | 22.3    | 280     | 90.6    | 9.4  | 98         | bone                         |
| CALML4      | 91860     | calmodulin like 4(CALML4)                                                               | 12.3            | 7.1    | 20.1    | 288     | 93.2    | 6.8        | 99         | 24.3            | 14.6   | 31.7    | 77      | 24.9    | 24.9 | 90.2       | cytoskeleton organization    |
| CALR        | 811       | calreticulin(CALR)                                                                      | 11.7            | 2.9    | 23      | 69      | 22.3    | 22.3       | 83.3       | 9.4             | 3.2    | 19.1    | 213     | 68.9    | 68.9 | 41.2       | immune system process        |
| CAND1.11    | 100130460 | uncharacterized LOC100130460(CAND1.11)                                                  | 14.1            | 8.1    | 20.1    | 53      | 17.2    | 82.8       | 24.5       | 16.2            | 7.1    | 26.9    | 109     | 35.3    | 35.3 | 77.5       | bone                         |
| CAPN3       | 825       | calpain 3(CAPN3)                                                                        | 15.2            | 5.8    | 21.7    | 42      | 13.6    | 86.4       | 21.6       | 4.9             | 1.6    | 12.3    | 208     | 67.3    | 67.3 | 42.2       | apoptotic process            |
| CASKIN1     | 57524     | CASK interacting protein 1(CASKIN1)                                                     | 9.7             | 5.5    | 15.5    | 171     | 55.3    | 55.3       | 52.9       | 19.1            | 10.4   | 26.9    | 149     | 48.2    | 48.2 | 73.5       | signaling                    |
| CASP8AP2    | 9994      | caspase 8 associated protein 2(CASP8AP2)                                                | 17.8            | 7.8    | 25.6    | 244     | 79      | 21         | 88.2       | 12.6            | 8.1    | 22      | 27      | 8.7     | 8.7  | 97.1       | apoptotic process            |
| CCDC102A    | 92922     | coiled-coil domain containing 102A(CCDC102A)                                            | 12              | 6.8    | 20.8    | 188     | 60.8    | 39.2       | 65.7       | 11.7            | 3.9    | 26.9    | 172     | 55.7    | 55.7 | 59.8       | cytoskeleton                 |
| CCDC136     | 64753     | coiled-coil domain containing 136(CCDC136)                                              | 9.1             | 3.9    | 17.2    | 132     | 42.7    | 57.3       | 45.1       | 10.7            | 3.2    | 21.4    | 252     | 81.6    | 81.6 | 28.4       | eye                          |
| CCDC88A     | 55704     | coiled-coil domain containing 88A(CCDC88A)                                              | 14.6            | 6.8    | 22.7    | 190     | 61.5    | 38.5       | 75.5       | 15.2            | 8.1    | 25.6    | 177     | 57.3    | 42.7 | 70.6       | cytoskeleton organization    |
| CCS         | 9973      | copper chaperone for superoxide dismutase(CCS)                                          | 14.2            | 8.7    | 20.1    | 102     | 33      | 67         | 41.2       | 15.2            | 6.8    | 21      | 204     | 66      | 66   | 46.1       | response to oxidative stress |
| CCT3        | 7203      | chaperonin containing TCP1 subunit 3(CCT3)                                              | 6.1             | 2.3    | 13.9    | 158     | 51.1    | 51.1       | 56.9       | 12.9            | 2.9    | 28.5    | 107     | 34.6    | 34.6 | 78.4       | lung                         |
| CDC37       | 11140     | cell division cycle 37(CDC37)                                                           | 9.1             | 2.9    | 17.5    | 164     | 53.1    | 53.1       | 52.9       | 11              | 2.3    | 21.7    | 151     | 48.9    | 48.9 | 61.8       | immune system process        |
| CDK2AP2     | 10263     | cyclin dependent kinase 2 associated protein 2(CDK2AP2)                                 | 10.7            | 4.2    | 17.8    | 185     | 59.9    | 59.9       | 48         | 15.9            | 6.5    | 27.2    | 151     | 48.9    | 48.9 | 63.7       | bone                         |
| CDKN1C      | 1028      | cyclin dependent kinase inhibitor 1C(CDKN1C)                                            | 10.4            | 3.2    | 19.4    | 145     | 46.9    | 53.1       | 54.9       | 9.7             | 4.5    | 20.4    | 121     | 39.2    | 60.8 | 48         | immune system process        |
| CECR5       | 27440     | cat eye syndrome chromosome region, candidate 5(CECR5)                                  | 8.4             | 3.6    | 16.5    | 167     | 54      | 54         | 52         | 9.1             | 2.9    | 18.8    | 185     | 59.9    | 59.9 | 52         | salivary gland               |
| CEP164      | 22897     | centrosomal protein 164(CEP164)                                                         | 6.5             | 1.6    | 16.9    | 94      | 30.4    | 30.2       | 75.5       | 7.8             | 2.3    | 18.8    | 229     | 74.1    | 74.1 | 33.3       | skin                         |
| CEP290      | 80184     | centrosomal protein 290(CEP290)                                                         | 10              | 3.6    | 19.1    | 266     | 86.1    | 86.1       | 21.6       | 12.3            | 2.9    | 18.2    | 150     | 48.5    | 48.4 | 59.8       | cytoskeleton                 |
| CETP        | 1071      | cholesterol ester transfer protein(CETP)                                                | 5.5             | 1.9    | 15.9    | 149     | 48.2    | 48.2       | 58.8       | 25.6            | 18.8   | 33      | 149     | 48.2    | 48.2 | 70.6       | extracellular exosome        |
| CHCHD4      | 131474    | coiled-coil-helix-coiled-coil-helix domain containing 4(CHCHD4)                         | 9.4             | 5.5    | 15.2    | 17      | 5.5     | 5.5        | 97.1       | 13.3            | 7.8    | 20.1    | 201     | 65      | 65   | 41.2       | gene expression              |
| CHD2        | 1106      | chromodomain helicase DNA binding protein 2(CHD2)                                       | 11.3            | 5.8    | 20.4    | 100     | 32.4    | 32.4       | 75.5       | 13.9            | 8.1    | 27.2    | 130     | 42.1    | 42.1 | 68.6       | immune system process        |
| CHD4        | 1108      | chromodomain helicase DNA binding protein 4(CHD4)                                       | 11              | 6.1    | 16.2    | 130     | 42.1    | 57.9       | 50         | 11              | 5.5    | 15.9    | 70      | 22.7    | 77.3 | 30.4       | cytoskeleton organization    |
| CHMP1B      | 57132     | charged multivesicular body protein 1B(CHMP1B)                                          | 15.5            | 8.1    | 24.3    | 59      | 19.1    | 19.1       | 89.2       | 28.8            | 15.5   | 38.5    | 133     | 43      | 43   | 81.4       | cytoskeleton organization    |
| CHMP2A      | 27243     | charged multivesicular body protein 2A(CHMP2A)                                          | 12.3            | 5.5    | 20.1    | 132     | 42.7    | 57.3       | 47.1       | 21.7            | 15.9   | 28.5    | 188     | 60.8    | 60.8 | 54.9       | autophagy                    |
| CHMP5       | 51510     | charged multivesicular body protein 5(CHMP5)                                            | 8.7             | 4.9    | 16.8    | 187     | 60.5    | 60.5       | 52         | 11.7            | 4.5    | 19.1    | 144     | 46.6    | 53.4 | 49         | cytoskeleton organization    |
| CHMP6       | 79643     | charged multivesicular body protein 6(CHMP6)                                            | 10.7            | 5.5    | 20.2    | 121     | 39.2    | 60.8       | 45.1       | 12              | 7.4    | 21.4    | 161     | 52.1    | 52.1 | 57.8       | autophagy                    |
| CLSTN1      | 22883     | calsyntenin 1(CLSTN1)                                                                   | 8.4             | 2.9    | 17.5    | 241     | 78      | 78         | 28.4       | 9.4             | 4.2    | 19.4    | 265     | 85.8    | 85.8 | 22.5       | extracellular exosome        |
| CMPK1       | 51727     | cytidine/uridine monophosphate kinase 1(CMPK1)                                          | 11.7            | 6.1    | 21      | 78      | 25.2    | 25.2       | 82.4       |                 |        |         |         |         |      |            |                              |

|           |        |                                                                       |      |      |      |     |      |      |      |      |      |      |     |      |      |      |                                    |
|-----------|--------|-----------------------------------------------------------------------|------|------|------|-----|------|------|------|------|------|------|-----|------|------|------|------------------------------------|
| CRABP2    | 1382   | cellular retinoic acid binding protein 2(CRABP2)                      | 15,9 | 9,4  | 23   | 103 | 33,3 | 33,3 | 73,5 | 32   | 19,1 | 39,2 | 104 | 33,7 | 33,7 | 90,2 | extracellular exosome              |
| CRIP2     | 1397   | cysteine rich protein 2(CRIP2)                                        | 11   | 4,9  | 19,1 | 174 | 56,3 | 56,3 | 54,9 | 26,5 | 14,6 | 38,2 | 169 | 54,7 | 54,7 | 66,7 | immune system process              |
| CRTAC1    | 55118  | cartilage acidic protein 1(CRTAC1)                                    | 9,7  | 4,2  | 18,8 | 223 | 72,2 | 72,2 | 31,7 | 13,6 | 4,5  | 27,2 | 75  | 24,3 | 24,3 | 85,3 | cartilage                          |
| CRYAB     | 1410   | crystallin alpha B(CRYAB)                                             | 17,5 | 10,1 | 24   | 258 | 83,5 | 16,5 | 92,2 | 7,8  | 3,9  | 14,2 | 158 | 51,1 | 51,1 | 52,9 | MAPK cascade                       |
| CRYGD     | 1421   | crystallin gamma D(CRYGD)                                             | 8,4  | 2,9  | 23   | 88  | 28,5 | 28,5 | 80,4 | 16,2 | 8,1  | 31,1 | 89  | 28,8 | 28,8 | 85,3 | response to oxidative stress       |
| CTTN      | 2017   | cortactin(CTTN)                                                       | 14,9 | 7,4  | 22,7 | 139 | 45   | 45   | 67,6 | 14,6 | 7,8  | 22,7 | 144 | 46,6 | 46,6 | 67,6 | apoptotic process                  |
| CWC15     | 51503  | CWC15 spliceosome associated protein homolog(CWC15)                   | 11,7 | 5,2  | 25,9 | 125 | 40,5 | 59,5 | 52,9 | 14,6 | 9,4  | 22,3 | 38  | 12,3 | 12,3 | 94,1 | blood                              |
| CXCL8     | 3576   | C-X-C motif chemokine ligand 8(CXCL8)                                 | 13,9 | 7,1  | 25,2 | 236 | 76,4 | 23,6 | 84,3 | 11,7 | 5,2  | 19,1 | 150 | 48,5 | 48,5 | 57,8 | inflammatory response              |
| CY5D1     | 124637 | cytochrome b5 domain containing 1(CY5D1)                              | 10,4 | 3,9  | 23,3 | 68  | 22   | 22   | 84,3 | 23,9 | 13,3 | 34,4 | 147 | 47,6 | 47,6 | 70,6 | eye                                |
| CYP2C18   | 1562   | cytochrome P450 family 2 subfamily C member 18(CYP2C18)               | 14,9 | 7,4  | 23,9 | 129 | 41,7 | 41,7 | 73,5 | 19,7 | 10,7 | 31,7 | 146 | 47,2 | 47,2 | 73,5 | blood                              |
| DAAM1     | 23002  | dishevelled associated activator of morphogenesis 1(DAAM1)            | 10   | 4,5  | 20,1 | 121 | 39,2 | 39,2 | 68,6 | 8,7  | 3,9  | 22   | 234 | 75,7 | 75,7 | 38,2 | cytoskeleton organization          |
| DCAF6     | 55827  | DDB1 and CUL4 associated factor 6(DCAF6)                              | 14,3 | 9,4  | 21,4 | 103 | 33,3 | 66,7 | 40,2 | 12,9 | 7,8  | 19,8 | 99  | 32   | 68   | 37,3 | gene expression                    |
| DCP1A     | 55802  | decapping mRNA 1A(DCP1A)                                              | 10   | 5,5  | 17,2 | 223 | 72,2 | 72,2 | 34,3 | 13,9 | 6,5  | 20,7 | 193 | 62,5 | 62,5 | 50   | muscle                             |
| DHRS4L2   | 317749 | dehydrogenase/reductase 4 like 2(DHRS4L2)                             | 11,3 | 5,2  | 18,8 | 170 | 55   | 55   | 51   | 15,5 | 5,2  | 24,3 | 64  | 20,7 | 20,7 | 86,3 | extracellular region               |
| DIAPH1    | 1729   | diaphanous related formin 1(DIAPH1)                                   | 13,3 | 6,1  | 22,7 | 40  | 12,9 | 87,1 | 20,6 | 9,7  | 2,9  | 22   | 154 | 49,8 | 49,8 | 60,8 | cytoskeleton organization          |
| DIP2C     | 22982  | disco interacting protein 2 homolog C(DIP2C)                          | 8,7  | 3,6  | 16,5 | 141 | 45,6 | 45,6 | 63,7 | 9,4  | 3,9  | 25,2 | 81  | 26,2 | 26,2 | 83,3 | lung                               |
| DMAP1     | 55929  | DNA methyltransferase 1 associated protein 1(DMAP1)                   | 18,8 | 10,4 | 28,2 | 228 | 73,8 | 26,2 | 84,3 | 15,5 | 10,4 | 21   | 268 | 86,7 | 13,3 | 94,1 | skin                               |
| DMTF1     | 9988   | cyclin D binding myb like transcription factor 1(DMTF1)               | 14,6 | 6,5  | 26,5 | 69  | 22,3 | 77,7 | 32,4 | 13,9 | 7,1  | 21   | 74  | 23,9 | 76,1 | 36,3 | muscle                             |
| DNASE1L3  | 1776   | deoxyribonuclease 1 like 3(DNASE1L3)                                  | 14,6 | 7,1  | 23,6 | 203 | 65,7 | 34,3 | 76,5 | 8,7  | 3,6  | 22   | 143 | 46,3 | 46,3 | 60,8 | apoptotic process                  |
| DNMT1     | 1786   | DNA methyltransferase 1(DNMT1)                                        | 14,6 | 7,4  | 25,9 | 106 | 34,3 | 34,3 | 79,4 | 23,3 | 11,3 | 34,6 | 124 | 40,1 | 40,1 | 78,4 | RNA binding                        |
| DNTTIP1   | 116092 | deoxynucleotidyltransferase terminal interacting protein 1(DNTTIP1)   | 11   | 5,8  | 20,4 | 10  | 3,2  | 96,8 | 11,8 | 12,3 | 3,6  | 25,2 | 123 | 39,8 | 39,8 | 74,5 | lung                               |
| DOCK2     | 1794   | dedicator of cytokinesis 2(DOCK2)                                     | 8,7  | 2,9  | 14,6 | 162 | 52,4 | 52,4 | 57,8 | 12,9 | 5,2  | 24,9 | 194 | 62,8 | 62,8 | 54,9 | immune system process              |
| DR1       | 1810   | down-regulator of transcription 1(DR1)                                | 9,7  | 3,9  | 18,4 | 257 | 83,2 | 83,2 | 25,5 | 9,1  | 3,6  | 18,1 | 182 | 58,9 | 58,9 | 53,9 | nucleic acid binding               |
| DUSP2     | 1844   | dual specificity phosphatase 2(DUSP2)                                 | 15,9 | 6,1  | 26,9 | 230 | 74,4 | 74,4 | 39,2 | 15,9 | 6,5  | 27,2 | 115 | 37,2 | 37,2 | 78,4 | MAPK cascade                       |
| DYNLL1    | 8655   | dynein light chain LC8-type 1(DYNLL1)                                 | 15,2 | 8,1  | 23   | 260 | 84,1 | 15,9 | 90,2 | 12,6 | 3,6  | 23,6 | 142 | 46   | 46   | 68,6 | immune system process              |
| EHBP1     | 23301  | EH domain binding protein 1(EHBP1)                                    | 9,1  | 5,2  | 20,1 | 109 | 35,3 | 64,7 | 43,1 | 5,9  | 2,6  | 18,5 | 80  | 25,9 | 74,1 | 34,3 | pituitary gland                    |
| EIF1AX    | 1964   | eukaryotic translation initiation factor 1A, X-linked(EIF1AX)         | 11,5 | 3,6  | 18,8 | 154 | 49,8 | 50,2 | 60,8 | 8,4  | 3,6  | 16   | 88  | 28,5 | 71,5 | 42,2 | RNA binding                        |
| EIF2B2    | 8892   | eukaryotic translation initiation factor 2B subunit beta(EIF2B2)      | 6,5  | 2,9  | 18,8 | 177 | 57,3 | 42,7 | 68,6 | 6,8  | 2,9  | 15,5 | 158 | 51,1 | 48,9 | 59,8 | lung                               |
| EIF2B3    | 8891   | eukaryotic translation initiation factor 2B subunit gamma(EIF2B3)     | 7,1  | 3,6  | 16,2 | 182 | 58,9 | 58,9 | 47,1 | 8,1  | 3,6  | 15,5 | 146 | 47,2 | 47,2 | 65,7 | blood                              |
| EIF3A     | 8661   | eukaryotic translation initiation factor 3 subunit A(EIF3A)           | 13,9 | 5,5  | 21,7 | 161 | 52,1 | 47,9 | 61,8 | 16,2 | 8,4  | 23   | 105 | 34   | 34   | 74,5 | MAPK cascade                       |
| EIF4E     | 1977   | eukaryotic translation initiation factor 4E(EIF4E)                    | 17,2 | 9,1  | 27,2 | 142 | 46   | 54   | 62,7 | 23,9 | 17,8 | 32   | 61  | 19,7 | 19,7 | 97,1 | defense response                   |
| EIF4G2    | 1982   | eukaryotic translation initiation factor 4 gamma 2(EIF4G2)            | 10,7 | 5,8  | 17,2 | 184 | 59,5 | 59,5 | 46,1 | 16,8 | 7,1  | 30,1 | 96  | 31,1 | 31,1 | 83,3 | autophagy                          |
| EIF4H     | 7458   | eukaryotic translation initiation factor 4H(EIF4H)                    | 12   | 6,8  | 22   | 232 | 75,1 | 24,9 | 80,4 | 32,4 | 23,3 | 43,7 | 149 | 48,2 | 48,2 | 80,4 | muscle                             |
| ELAVL3    | 1995   | ELAV like RNA binding protein 3(ELAVL3)                               | 11   | 3,2  | 19,7 | 106 | 34,3 | 34,3 | 75,5 | 16,8 | 8,7  | 32   | 123 | 39,8 | 39,8 | 78,4 | RNA recognition motif              |
| ENO1      | 2023   | enolase 1(ENO1)                                                       | 16,5 | 7,1  | 23,3 | 61  | 19,7 | 19,7 | 88,2 | 16,2 | 9,7  | 25,9 | 138 | 44,7 | 44,7 | 66,7 | response to other organism         |
| EOMES     | 8320   | eomesodermin(EOMES)                                                   | 16,5 | 6,1  | 26,9 | 254 | 82,2 | 82,2 | 29,4 | 9,7  | 3,9  | 16,2 | 146 | 47,2 | 52,8 | 50   | immune system process              |
| EPS15L1   | 58513  | epidermal growth factor receptor pathway substrate 15 like 1(EPS15L1) | 6,1  | 1,6  | 11,3 | 34  | 11   | 89   | 17,6 | 9,1  | 3,9  | 16,5 | 297 | 96,1 | 96,1 | 12,7 | signaling                          |
| ERGIC3    | 51614  | ERGIC and golgi 3(ERGIC3)                                             | 9,7  | 5,5  | 18,4 | 75  | 24,3 | 24,3 | 80,4 | 25,9 | 18,1 | 34   | 144 | 46,6 | 46,6 | 74,5 | skin                               |
| ERP29     | 10961  | endoplasmic reticulum protein 29(ERP29)                               | 10,7 | 5,8  | 17,2 | 161 | 52,1 | 52,1 | 53,9 | 9,4  | 5,2  | 21   | 166 | 53,7 | 53,7 | 56,9 | MAPK cascade                       |
| F12       | 2161   | coagulation factor XIII(F12)                                          | 11,5 | 5,8  | 22   | 244 | 79   | 21   | 84,3 | 11,8 | 6,5  | 18,1 | 147 | 47,6 | 47,6 | 58,8 | inflammatory response              |
| FAM13C    | 220965 | family with sequence similarity 13 member C(FAM13C)                   | 11,7 | 5,2  | 19,1 | 157 | 50,8 | 49,2 | 56,9 | 12,9 | 8,7  | 20,4 | 200 | 64,7 | 64,7 | 46,1 | eye                                |
| FAM234A   | 83986  | family with sequence similarity 234 member A(FAM234A)                 | 15,2 | 10   | 27,2 | 151 | 48,9 | 48,9 | 65,7 | 15,9 | 10   | 29,8 | 150 | 48,5 | 48,5 | 67,6 | extracellular exosome              |
| FAM89B    | 23625  | family with sequence similarity 89 member B(FAM89B)                   | 7,4  | 2,3  | 13,9 | 97  | 31,4 | 68,6 | 38,2 | 19,1 | 11,3 | 24,9 | 55  | 17,8 | 17,8 | 93,1 | lung                               |
| FBXO18    | 84893  | F-box protein, helicase, 18(FBXO18)                                   | 3,9  | 0,6  | 9,4  | 171 | 55,3 | 55,3 | 49   | 6,1  | 1,3  | 23,3 | 83  | 26,9 | 26,9 | 81,4 | apoptotic process                  |
| FBXO18    | 84893  | F-box protein, helicase, 18(FBXO18)                                   | 2,3  | 0,3  | 10,4 | 162 | 52,4 | 52,4 | 51   | 5,2  | 1,9  | 26,9 | 95  | 30,7 | 30,7 | 82,4 | apoptotic process                  |
| FGA       | 2243   | fibrinogen alpha chain(FGA)                                           | 8,7  | 3,2  | 21,7 | 133 | 43   | 43   | 66,7 | 11,7 | 6,5  | 18,1 | 145 | 46,9 | 46,9 | 63,7 | immune system process              |
| FN1       | 2335   | fibronectin 1(FN1)                                                    | 8,7  | 2,9  | 20,1 | 180 | 58,3 | 58,3 | 53,9 | 14,9 | 3,9  | 26,2 | 155 | 50,2 | 50,2 | 65,7 | inflammatory response              |
| FOXP1     | 27086  | forkhead box P1(FOXP1)                                                | 8,8  | 1,6  | 15,5 | 120 | 38,8 | 38,8 | 68,6 | 15,2 | 8,4  | 23,3 | 143 | 46,3 | 46,3 | 62,7 | immune system process              |
| GIT2      | 9815   | GIT ArfGAP 2(GIT2)                                                    | 12   | 3,6  | 19,7 | 51  | 16,5 | 16,5 | 88,2 | 14,6 | 3,2  | 23,6 | 143 | 46,3 | 46,3 | 62,7 | skin                               |
| GLT8D1    | 55830  | glycosyltransferase 8 domain containing 1(GLT8D1)                     | 13,9 | 4,9  | 22,3 | 175 | 56,6 | 56,6 | 53,9 | 27,2 | 18,8 | 39,5 | 123 | 39,8 | 39,8 | 82,4 | bone                               |
| GPATCH4   | 54865  | G-patch domain containing 4(GPATCH4)                                  | 10,8 | 5,2  | 22,7 | 252 | 81,6 | 18,4 | 87,3 | 14,9 | 8,7  | 22,3 | 143 | 36,3 | 46,3 | 63,7 | immune system process              |
| GPCPD1    | 56261  | glycerophosphocholine phosphodiesterase 1(GPCPD1)                     | 9,1  | 5,2  | 15,2 | 198 | 64,1 | 64,1 | 43,1 | 11,7 | 5,2  | 25,3 | 169 | 54,7 | 54,7 | 61,8 | skeletal muscle tissue development |
| GREM1     | 26585  | gremlin 1, DAN family BMP antagonist(GREM1)                           | 12,7 | 5,8  | 18,5 | 111 | 35,9 | 35,9 | 70,6 | 24,6 | 16,8 | 32   | 84  | 27,2 | 27,2 | 89,2 | immune system process              |
| GSN       | 2934   | gelsolin(GSN)                                                         | 13,6 | 5,9  | 22,1 | 193 | 62,5 | 37,5 | 68,6 | 10,4 | 3,9  | 34   | 135 | 43,7 | 43,7 | 74,5 | immune system process              |
| GTF2F1    | 2962   | general transcription factor IIF subunit 1(GTF2F1)                    | 15,5 | 8,4  | 22,3 | 260 | 84,1 | 15,9 | 91,2 | 14,9 | 5,8  | 24,6 | 131 | 42,4 | 42,4 | 70,6 | response to other organism         |
| HACL1     | 26061  | 2-hydroxyacyl-CoA lyase 1(HACL1)                                      | 8,4  | 3,6  | 18,1 | 204 | 66   | 34   | 72,5 | 23,3 | 14,9 | 33,3 | 129 | 41,7 | 41,7 | 76,5 | lung                               |
| HCLS1     | 3059   | hematopoietic cell-specific Lyn substrate 1(HCLS1)                    | 17,5 | 10,4 | 23   | 50  | 16,2 | 16,2 | 93,1 | 17,5 | 9,4  | 24,9 | 56  | 18,1 | 18,1 | 90,2 | immune system process              |
| HDHD2     | 84064  | haloacid dehalogenase like hydrolase domain containing 2(HDHD2)       | 11,3 | 3,6  | 21,4 | 59  | 19,1 | 19,1 | 86,3 | 19,7 | 12,6 | 28,5 | 128 | 41,4 | 41,4 | 70,6 | extracellular exosome              |
| HEATR5B   | 54497  | HEAT repeat containing 5B(HEATR5B)                                    | 9,7  | 5,8  | 17,2 | 147 | 47,6 | 47,6 | 57,8 | 26,2 | 18,4 | 36,6 | 107 | 34,6 | 34,6 | 84,3 | extracellular exosome              |
| HES1      | 3280   | hes family bHLH transcription factor 1(HES1)                          | 11,7 | 5,2  | 21   | 166 | 53,7 | 53,7 | 53,9 | 13,9 | 5,5  | 24,9 | 183 | 59,2 | 59,2 | 53,9 | immune system process              |
| HIP1R     | 9026   | huntingtin interacting protein 1 related(HIP1R)                       | 14,9 | 7,1  | 21,4 | 159 | 51,5 | 51,5 | 58,8 | 20,4 | 12   | 31,7 | 132 | 42,7 | 42,7 | 75,5 | apoptotic process                  |
| HM13      | 81502  | histocompatibility minor 13(HM13)                                     | 7,8  | 3,9  | 19,4 | 121 | 39,2 | 39,2 | 64,7 | 13,3 | 8,1  | 18,4 | 113 | 36,6 | 36,6 | 70,6 | proteolysis                        |
| HMG20A    | 10363  | high mobility group 20A(HMG20A)                                       | 15,9 | 4,9  | 30,4 | 145 | 46,9 | 46,9 | 71,6 | 21   | 5,2  | 34,3 | 161 | 52,1 | 52,1 | 72,5 | nucleic acid binding               |
| HN1L      | 90861  | hematological and neurological expressed 1(HN1L)                      | 11,5 | 7    | 19,4 | 169 | 54,7 | 45,3 | 61,8 | 12,9 | 6,5  | 20,4 | 115 | 37,2 | 37,2 | 69,6 | skin                               |
| HNRNPA1   | 3178   | heterogeneous nuclear ribonucleoprotein A1(HNRNPA1)                   | 11   | 4,5  | 20,1 | 150 | 48,5 | 48,5 | 60,8 | 12,6 | 7,8  | 20,7 | 154 | 49,8 | 49,8 | 59,8 | lung                               |
| HNRNPA1   | 3178   | heterogeneous nuclear ribonucleoprotein A1(HNRNPA1)                   | 9,1  | 4,5  | 20,7 | 195 | 63,1 | 63,1 | 49   | 12,3 | 6,1  | 24,6 | 180 | 58,3 | 58,3 | 57,8 | lung                               |
| HNRNPA1   | 3178   | heterogeneous nuclear ribonucleoprotein A1(HNRNPA1)                   | 4    | 1    | 17,4 | 133 | 43   | 41,1 | 67,3 | 22,7 | 15,2 | 34,3 | 150 | 48,5 | 48,5 | 72,5 | lung                               |
| HNRNPA1L2 | 144983 | heterogeneous nuclear ribonucleoprotein A1-like 2(HNRNPA1L2)          | 11,3 | 4,5  | 20,7 | 64  | 20,7 | 79,3 | 28,4 | 10,7 | 5,5  | 25,2 | 111 | 35,9 | 35,9 | 73,5 | skin                               |
| HNRNPA2B1 | 3181   | heterogeneous nuclear ribonucleoprotein A2/B1(HNRNPA2B1)              | 12,3 | 6,8  | 17,5 | 193 | 62,5 | 62,5 | 47,1 | 17,8 | 9,7  | 26,5 | 160 | 51,8 | 51,8 | 61,8 | RNA recognition motif              |
| HNRNPAB   | 3182   | heterogeneous nuclear ribonucleoprotein A/B(HNRNPAB)                  | 13,9 | 5,8  | 20,4 | 121 | 39,2 | 39,2 | 72,5 | 10,9 | 5,5  | 21   | 257 | 83,2 | 16,8 | 88,2 | skin                               |

|          |        |                                                                      |      |      |      |     |      |      |      |      |      |      |     |      |      |      |                              |
|----------|--------|----------------------------------------------------------------------|------|------|------|-----|------|------|------|------|------|------|-----|------|------|------|------------------------------|
| HPCAL4   | 51440  | hippocalcin like 4(HPCAL4)                                           | 9,1  | 5,2  | 20,1 | 128 | 41,4 | 41,4 | 63,7 | 15,9 | 10,7 | 31,4 | 134 | 43,4 | 43,4 | 73,5 | eye                          |
| HPD      | 3242   | 4-hydroxyphenylpyruvate dioxygenase(HPD)                             | 6,5  | 3,2  | 12,9 | 204 | 66   | 66   | 41,2 | 9,1  | 4,2  | 20,7 | 162 | 52,4 | 52,4 | 57,8 | extracellular exosome        |
| HPX      | 3263   | hemopexin(HPX)                                                       | 3,2  | 1    | 17,8 | 131 | 42,4 | 42,4 | 64,7 | 6,5  | 1,6  | 21   | 166 | 53,7 | 53,7 | 57,8 | immune system process        |
| HSBP1    | 3281   | heat shock factor binding protein 1(HSBP1)                           | 11   | 5,5  | 21,7 | 121 | 39,2 | 39,2 | 71,6 | 12,6 | 6,5  | 20,4 | 120 | 38,8 | 38,8 | 70,6 | muscle                       |
| HSPD1    | 3329   | heat shock protein family D (Hsp60) member 1(HSPD1)                  | 15,2 | 6,8  | 21   | 48  | 15,5 | 15,5 | 91,2 | 13,4 | 6,1  | 19,1 | 82  | 26,5 | 26,5 | 79,4 | inflammatory response        |
| HSPD1    | 3329   | heat shock protein family D (Hsp60) member 1(HSPD1)                  | 9,1  | 2,6  | 18,8 | 220 | 71,2 | 71,2 | 40,2 | 6,8  | 2,9  | 20,4 | 190 | 61,5 | 61,5 | 52   | inflammatory response        |
| HSPH1    | 10808  | heat shock protein family H (Hsp110) member 1(HSPH1)                 | 7,4  | 2,3  | 16,2 | 171 | 55,3 | 55,3 | 58,8 | 7,8  | 3,2  | 15,2 | 175 | 56,6 | 56,6 | 56,9 | immune system process        |
| HYOU1    | 10525  | hypoxia up-regulated 1(HYOU1)                                        | 7,1  | 3,2  | 17,8 | 180 | 58,3 | 58,3 | 51   | 23,6 | 15,2 | 37,9 | 116 | 37,5 | 37,5 | 83,3 | apoptotic process            |
| IFT22    | 64792  | intraflagellar transport 22(IFT22)                                   | 13,9 | 4,3  | 21,8 | 41  | 13,3 | 86,7 | 22,5 | 6,2  | 2,8  | 18,1 | 67  | 21,7 | 21,7 | 26,5 | lung                         |
| IL10     | 3586   | interleukin 10(IL10)                                                 | 11,7 | 3,9  | 21   | 100 | 32,4 | 32,4 | 74,5 | 12,6 | 6,8  | 21,4 | 217 | 70,2 | 70,2 | 43,1 | inflammatory response        |
| IL12B    | 3593   | interleukin 12B(IL12B)                                               | 9,4  | 4,2  | 16,2 | 73  | 23,6 | 23,6 | 79,4 | 8,1  | 3,6  | 16,6 | 208 | 67,3 | 67,3 | 43,1 | inflammatory response        |
| ILKAP    | 80895  | ILK associated serine/threonine phosphatase(ILKAP)                   | 4,9  | 1,6  | 17,5 | 133 | 43   | 43   | 63,7 | 27,2 | 16,2 | 38,5 | 121 | 39,2 | 39,2 | 83,3 | pituitary gland              |
| IMP3     | 55272  | IMP3, U3 small nucleolar ribonucleoprotein(IMP3)                     | 10   | 4,5  | 17,8 | 137 | 44,3 | 44,3 | 59,8 | 12,9 | 6,8  | 19,7 | 43  | 13,9 | 13,9 | 90,2 | eye                          |
| IMPACT   | 55364  | impact RWD domain protein(IMPACT)                                    | 4,5  | 1,6  | 17,2 | 216 | 69,9 | 69,9 | 39,2 | 11,3 | 6,1  | 26,9 | 198 | 64,1 | 64,1 | 52   | response to oxidative stress |
| IRAK1    | 3654   | interleukin 1 receptor associated kinase 1(IRAK1)                    | 5,5  | 1,9  | 13   | 151 | 48,9 | 48,9 | 54,9 | 8,4  | 2,9  | 21,9 | 162 | 52,4 | 52,4 | 61,8 | immune system process        |
| ISCU     | 23479  | iron-sulfur cluster assembly enzyme(ISCU)                            | 15,5 | 8,7  | 23,3 | 42  | 13,6 | 86,4 | 21,6 | 3,2  | 1    | 7,1  | 197 | 63,8 | 63,8 | 43,1 | gene expression              |
| ITPKB    | 3707   | inositol-trisphosphate 3-kinase B(ITPKB)                             | 15,9 | 8,7  | 22   | 198 | 64,1 | 64,1 | 45,1 | 16,8 | 9,7  | 27,2 | 225 | 72,8 | 72,8 | 40,2 | immune system process        |
| KANK2    | 25959  | KN motif and ankyrin repeat domains 2(KANK2)                         | 8,1  | 1,9  | 17,2 | 173 | 56   | 56   | 53,9 | 11   | 1,9  | 21,4 | 157 | 50,8 | 50,8 | 59,8 | apoptotic process            |
| KCNF1    | 3754   | potassium voltage-gated channel modifier subfamily F member 1(KCNF1) | 13,3 | 7,8  | 23,5 | 111 | 35,9 | 64,1 | 47,1 | 12,9 | 7,1  | 25,6 | 81  | 26,2 | 26,2 | 82,4 | eye                          |
| KCNIP1   | 30820  | potassium voltage-gated channel interacting protein 1(KCNIP1)        | 10   | 5,2  | 17,5 | 161 | 52,1 | 52,1 | 56,9 | 15,2 | 8,1  | 31,1 | 176 | 57   | 57   | 62,7 | eye                          |
| KDM3B    | 51780  | lysine demethylase 3B(KDM3B)                                         | 8,1  | 4,2  | 20,1 | 178 | 57,6 | 42,4 | 64,7 | 16,5 | 10   | 28,8 | 164 | 53,1 | 53,1 | 59,8 | eye                          |
| KDM6B    | 23135  | lysine demethylase 6B(KDM6B)                                         | 13,6 | 2,9  | 25,8 | 141 | 45,6 | 39,8 | 70   | 19,4 | 2,3  | 29,1 | 165 | 53,4 | 53,4 | 61,8 | inflammatory response        |
| KIF5A    | 3798   | kinesin family member 5A(KIF5A)                                      | 10,4 | 4,2  | 18,5 | 156 | 50,5 | 50,5 | 52   | 11,3 | 2,3  | 30,7 | 115 | 37,2 | 37,2 | 77,5 | immune system process        |
| KIF5B    | 3799   | kinesin family member 5B(KIF5B)                                      | 15,5 | 6,8  | 32,4 | 214 | 69,3 | 30,7 | 84,3 | 24,9 | 17,2 | 34,3 | 100 | 32,4 | 32,4 | 84,3 | muscle                       |
| KRI1     | 65095  | KRI1 homolog(KRI1)                                                   | 10,4 | 4,2  | 16,2 | 152 | 49,2 | 49,2 | 56,9 | 14,5 | 9,7  | 19,7 | 214 | 69,3 | 69,3 | 44,1 | lung                         |
| LARP4    | 113251 | La ribonucleoprotein domain family member 4(LARP4)                   | 9,1  | 3,9  | 14,6 | 173 | 56   | 56   | 54,9 | 11   | 4,2  | 21,7 | 196 | 63,4 | 63,4 | 52,9 | cytoskeleton organization    |
| LGALS1   | 29094  | galectin like(LGALS1)                                                | 3,9  | 0,6  | 16,8 | 239 | 77,3 | 77,3 | 34,3 | 9,7  | 1    | 24,3 | 163 | 52,8 | 52,8 | 61,8 | blood                        |
| LIAS     | 11019  | lipoic acid synthetase(LIAS)                                         | 15,9 | 7,5  | 25,6 | 50  | 16,2 | 88,4 | 24,2 | 12,9 | 4,2  | 19,7 | 146 | 47,2 | 47,2 | 58,8 | inflammatory response        |
| LITAF    | 9516   | lipopolysaccharide induced TNF factor(LITAF)                         | 8,4  | 3,2  | 15,9 | 165 | 53,4 | 53,4 | 50   | 19,6 | 11   | 32,7 | 86  | 27,8 | 27,8 | 87,3 | apoptotic process            |
| LONRF1   | 91694  | LON peptidase N-terminal domain and ring finger 1(LONRF1)            | 11,3 | 4,9  | 24,3 | 158 | 51,1 | 51,1 | 59,8 | 12   | 4,8  | 20,7 | 136 | 44   | 44   | 69,6 | proteolysis                  |
| LRCC1    | 85444  | leucine rich repeat and coiled-coil centrosomal protein 1(LRCC1)     | 7,8  | 2,6  | 17,5 | 126 | 40,8 | 40,8 | 64,7 | 12,6 | 4,9  | 19,7 | 134 | 43,4 | 43,4 | 65,7 | cytoskeleton                 |
| LSM1     | 27257  | LSM1 homolog, mRNA degradation associated(LSM1)                      | 11,3 | 5,8  | 19,7 | 147 | 47,6 | 52,4 | 54,9 | 12   | 6,5  | 26,5 | 85  | 27,5 | 27,5 | 82,4 | eye                          |
| LUC7L    | 55692  | LUC7 like(LUC7L)                                                     | 10,7 | 6,1  | 16,2 | 19  | 6,1  | 93,9 | 11,8 | 7,1  | 3,9  | 16,2 | 168 | 54,4 | 54,4 | 56,9 | lung                         |
| MAG      | 4099   | myelin associated glycoprotein(MAG)                                  | 10,1 | 4,2  | 19,1 | 68  | 22   | 78   | 27,5 | 12,3 | 5,5  | 20,7 | 248 | 80,3 | 80,3 | 25,5 | immune system process        |
| MAN2A2   | 4122   | mannosidase alpha class 2A member 2(MAN2A2)                          | 8,7  | 4,5  | 21   | 100 | 32,4 | 32,4 | 77,5 | 11   | 3,2  | 21,4 | 146 | 47,2 | 47,2 | 62,7 | eye                          |
| MAP2     | 4133   | microtubule associated protein 2(MAP2)                               | 8,1  | 2,3  | 14,2 | 207 | 67   | 33   | 73,5 | 11,3 | 6,5  | 20,1 | 189 | 61,2 | 61,2 | 43,1 | cytoskeleton organization    |
| MAZ      | 4150   | MYC associated zinc finger protein(MAZ)                              | 10,4 | 5,2  | 21,1 | 141 | 45,6 | 45,5 | 62,7 | 9,4  | 3,6  | 17,5 | 119 | 38,5 | 38,5 | 68,6 | RNA binding                  |
| MDK      | 4192   | midkine (neurite growth-promoting factor 2)(MDK)                     | 4,9  | 2,3  | 12,3 | 177 | 57,3 | 57,3 | 52   | 17,5 | 11,7 | 28,8 | 125 | 40,5 | 40,5 | 74,5 | apoptotic process            |
| MED29    | 55588  | mediator complex subunit 29(MED29)                                   | 10   | 4,2  | 26,9 | 223 | 72,2 | 27,8 | 82,4 | 9,7  | 4,2  | 24,3 | 128 | 41,4 | 58,6 | 50   | gene expression              |
| MED8     | 112950 | mediator complex subunit 8(MED8)                                     | 12,6 | 6,8  | 18,2 | 155 | 50,2 | 49,8 | 56,9 | 8,1  | 2,9  | 23   | 69  | 22,3 | 22,3 | 84,3 | gene expression              |
| MIA3     | 375056 | MIA family member 3, ER export factor(MIA3)                          | 9,4  | 4,2  | 16,2 | 159 | 51,5 | 51,5 | 60,8 | 10   | 4,5  | 18,4 | 154 | 49,8 | 49,8 | 56,9 | immune system process        |
| MIER2    | 54531  | MIER family member 2(MIER2)                                          | 7,4  | 2,6  | 16,5 | 169 | 54,7 | 54,7 | 53,9 | 7,4  | 3,6  | 16,8 | 156 | 50,5 | 50,5 | 59,8 | lung                         |
| MKRN1    | 23608  | makorin ring finger protein 1(MKRN1)                                 | 15,2 | 8,4  | 22,7 | 242 | 78,3 | 78,3 | 28,4 | 20,4 | 12,3 | 31,1 | 80  | 25,9 | 25,9 | 88,2 | skin                         |
| MLLT10   | 8028   | myeloid/lymphoid or mixed-lineage leukemia                           | 11   | 3,2  | 24   | 80  | 25,9 | 25,9 | 82,4 | 20,2 | 7,4  | 33   | 120 | 38,8 | 38,8 | 78,4 | lung                         |
| MMAB     | 326625 | methylmalonic aciduria (cobalamin deficiency) cblB type(MMAB)        | 13,3 | 8,5  | 23,9 | 90  | 29,1 | 70,9 | 39,2 | 20,4 | 12,3 | 31,7 | 136 | 44   | 44   | 71,6 | lung                         |
| MOG      | 4340   | myelin oligodendrocyte glycoprotein(MOG)                             | 8,1  | 2,9  | 13,6 | 231 | 74,8 | 74,8 | 32,4 | 11   | 6,1  | 17,2 | 209 | 67,6 | 67,6 | 43,1 | disease mutation             |
| MPHOSPH8 | 54737  | M-phase phosphoprotein 8(MPHOSPH8)                                   | 15,9 | 9,1  | 22   | 16  | 5,2  | 94,8 | 17,6 | 14,2 | 5,8  | 22,7 | 25  | 8,1  | 91,9 | 19,6 | extracellular exosome        |
| MPST     | 4357   | mercaptopyruvate sulfurtransferase(MPST)                             | 14,2 | 9,4  | 26,2 | 149 | 48,2 | 51,8 | 59,8 | 24,9 | 13,9 | 35,9 | 100 | 32,4 | 32,4 | 85,3 | muscle                       |
| MRPL11   | 65003  | mitochondrial ribosomal protein L11(MRPL11)                          | 11   | 5,2  | 21,7 | 253 | 81,9 | 81,9 | 26,5 | 13,6 | 5,5  | 26,2 | 237 | 76,7 | 76,7 | 36,3 | RNA binding                  |
| MS4A4A   | 51338  | membrane spanning 4-domains A4A(MS4A4A)                              | 11,7 | 1,9  | 23,6 | 158 | 51,1 | 51,1 | 58,8 | 13,6 | 5,5  | 22,7 | 121 | 39,2 | 39,2 | 71,6 | blood                        |
| MTA2     | 9219   | metastasis associated 1 family member 2(MTA2)                        | 7,4  | 3,9  | 13,9 | 135 | 43,7 | 43,7 | 63,7 | 14,2 | 7,1  | 23,9 | 148 | 47,9 | 47,9 | 66,7 | nucleic acid binding         |
| MX1      | 4599   | MX dynamin like GTPase 1(MX1)                                        | 16,5 | 4,5  | 25,9 | 128 | 41,4 | 41,4 | 68,6 | 11,7 | 5,5  | 17,2 | 207 | 67   | 67   | 42,2 | immune system process        |
| MYLK     | 4638   | myosin light chain kinase(MYLK)                                      | 15,4 | 9,7  | 23,7 | 85  | 27,5 | 74,9 | 37   | 14   | 5,8  | 22,3 | 47  | 15,2 | 84,8 | 21,6 | lung                         |
| NAA11    | 84779  | N(alpha)-acetyltransferase 11, NatA catalytic subunit(NAA11)         | 11   | 5,2  | 17,5 | 105 | 34   | 66   | 43,1 | 11,3 | 6,5  | 16,2 | 221 | 71,5 | 71,5 | 38,2 | skin                         |
| NAA35    | 60560  | N(alpha)-acetyltransferase 35, NatC auxiliary subunit(NAA35)         | 8,7  | 3,9  | 17,5 | 134 | 43,4 | 43,4 | 68,6 | 9,7  | 4,2  | 22,3 | 148 | 47,9 | 47,9 | 66,7 | apoptotic process            |
| NAP1L4   | 4676   | nucleosome assembly protein 1 like 4(NAP1L4)                         | 12,3 | 3,9  | 18,8 | 96  | 31,1 | 68,9 | 41,2 | 15,9 | 9,4  | 23,6 | 31  | 10   | 10   | 97,1 | muscle                       |
| NCOA5    | 57727  | nuclear receptor coactivator 5(NCOA5)                                | 21,7 | 9,1  | 30,1 | 232 | 75,1 | 24,9 | 88,2 | 16,4 | 8,1  | 24,9 | 174 | 56,3 | 43,7 | 66,7 | cytoskeleton                 |
| NET1     | 10276  | neuroepithelial cell transforming 1(NET1)                            | 12,2 | 5,7  | 23,2 | 229 | 74,1 | 25,9 | 80,4 | 10   | 5,2  | 16,5 | 147 | 47,6 | 47,6 | 61,8 | apoptotic process            |
| NEUROD2  | 4761   | neuronal differentiation 2(NEUROD2)                                  | 5,4  | 0    | 13,8 | 189 | 61,2 | 59,6 | 51   | 12,9 | 4,5  | 26,9 | 101 | 32,7 | 32,7 | 79,4 | defense response             |
| NHSL1    | 57224  | NHS like 1(NHSL1)                                                    | 10   | 4,5  | 17,8 | 165 | 53,4 | 53,4 | 55,9 | 15,2 | 6,5  | 23,3 | 160 | 51,8 | 51,8 | 59,8 | cell differentiation         |
| NONO     | 4841   | non-POU domain containing, octamer-binding(NONO)                     | 9,7  | 5,5  | 17,2 | 81  | 26,2 | 73,8 | 33,3 | 26,5 | 16,8 | 35,3 | 116 | 37,5 | 37,5 | 82,4 | apoptotic process            |
| NOP58    | 51602  | NOP58 ribonucleoprotein(NOP58)                                       | 18,4 | 10,7 | 28,2 | 161 | 52,1 | 47,9 | 63,7 | 5,2  | 1    | 18,1 | 116 | 37,5 | 37,5 | 67,6 | skin                         |
| NOS1AP   | 9722   | nitric oxide synthase 1 adaptor protein(NOS1AP)                      | 10,2 | 4,2  | 18,1 | 147 | 47,6 | 47,6 | 57,4 | 10   | 5,8  | 23   | 244 | 79   | 79   | 32,4 | gene expression              |
| NOVA2    | 4858   | NOVA alternative splicing regulator 2(NOVA2)                         | 13   | 6,8  | 21,7 | 153 | 49,5 | 49,5 | 57,8 | 14,9 | 7,8  | 21,7 | 158 | 51,1 | 51,1 | 58,8 | RNA binding                  |
| NOVA2    | 4858   | NOVA alternative splicing regulator 2(NOVA2)                         | 10,4 | 5,5  | 15,9 | 140 | 45,3 | 45,3 | 60,8 | 10,4 | 6,8  | 15,9 | 130 | 42,1 | 42,1 | 65,7 | RNA binding                  |
| NRP1     | 8829   | neuropilin 1(NRP1)                                                   | 11   | 5,8  | 15,9 | 211 | 68,3 | 68,3 | 37,3 | 10   | 5,8  | 15,9 | 216 | 69,9 | 69,9 | 38,2 | MAPK cascade                 |
| NSMAF    | 8439   | neutral sphingomyelinase activation associated factor(NSMAF)         | 12,3 | 6,1  | 21,7 | 291 | 94,2 | 5,8  | 99   | 17   | 8,4  | 27,8 | 74  | 23,9 | 23,9 | 86,3 | apoptotic process            |
| NT5C     | 30833  | 5', 3'-nucleotidase, cytosolic(NT5C)                                 | 7,1  | 2,3  | 13,3 | 105 | 34   | 66   | 38,2 | 14,6 | 9,4  | 22,7 | 234 | 75,7 | 75,7 | 35,3 | lung                         |
| NUDT16   | 131870 | nudix hydrolase 16(NUDT16)                                           | 12   | 5,8  | 23,3 | 175 | 56,6 | 56,6 | 51   | 33,3 | 25,6 | 41,8 | 122 | 39,5 | 39,5 | 85,3 | proteolysis                  |
| NUMA1    | 4926   | nuclear mitotic apparatus protein 1(NUMA1)                           | 10,7 | 6,1  | 16,1 | 295 | 95,5 | 4,5  | 99   | 31,1 | 16,5 | 39,8 | 109 | 35,3 | 35,3 | 87,3 | cytoskeleton organization    |

|           |           |                                                                                |      |      |      |     |      |      |      |      |      |      |     |      |      |      |                                  |
|-----------|-----------|--------------------------------------------------------------------------------|------|------|------|-----|------|------|------|------|------|------|-----|------|------|------|----------------------------------|
| NUP133    | 55746     | nucleoporin 133(NUP133)                                                        | 12.6 | 3.9  | 22.7 | 80  | 25.9 | 74.1 | 40.2 | 9.1  | 2.6  | 20.7 | 62  | 20.1 | 79.9 | 32.4 | skin                             |
| OGFR      | 11054     | opioid growth factor receptor(OGFR)                                            | 13.3 | 9.1  | 19.1 | 108 | 35   | 65   | 44.1 | 12.6 | 7.4  | 22.1 | 128 | 41.4 | 58.6 | 49   | skin                             |
| PAFAH2    | 5051      | platelet activating factor acetylhydrolase 2(PAFAH2)                           | 10.7 | 4.2  | 24.7 | 221 | 71.5 | 28.5 | 82.4 | 16.2 | 2.9  | 31.7 | 112 | 36.2 | 36.2 | 81.4 | apoptotic process                |
| PARP1     | 142       | poly(ADP-ribose) polymerase 1(PARP1)                                           | 10.7 | 2.9  | 24.6 | 139 | 45   | 45   | 69.6 | 9.7  | 2.3  | 22.3 | 145 | 46.9 | 46.9 | 73.5 | immune system process            |
| PARP8     | 79668     | poly(ADP-ribose) polymerase family member 8(PARP8)                             | 10   | 5.5  | 18.4 | 140 | 45.3 | 54.7 | 53.9 | 11.3 | 4.9  | 22   | 154 | 49.8 | 50.2 | 57.8 | inflammation                     |
| PBRM1     | 55193     | polybromo 1(PBRM1)                                                             | 7.4  | 3.2  | 15.9 | 161 | 52.1 | 52.1 | 54.9 | 11.7 | 2.9  | 20.1 | 140 | 45.3 | 45.3 | 63.7 | nucleic acid binding             |
| PCSK1N    | 27344     | proprotein convertase subtilisin/kexin type 1 inhibitor(PCSK1N)                | 16.8 | 4.9  | 26.5 | 234 | 75.7 | 75.7 | 41.2 | 14.9 | 6.8  | 28.8 | 239 | 77.3 | 77.3 | 39.2 | regulation of peptidase activity |
| PCSK1N    | 27344     | proprotein convertase subtilisin/kexin type 1 inhibitor(PCSK1N)                | 14.2 | 4.5  | 27.5 | 214 | 69.3 | 69.3 | 44.1 | 14.9 | 6.1  | 28.8 | 250 | 80.9 | 80.9 | 37.3 | regulation of peptidase activity |
| PCSK1N    | 27344     | proprotein convertase subtilisin/kexin type 1 inhibitor(PCSK1N)                | 11.7 | 4.5  | 27.8 | 244 | 79   | 79   | 36.3 | 12.3 | 6.5  | 27.2 | 223 | 72.2 | 72.2 | 43.1 | regulation of peptidase activity |
| pde1b     | 5153      | phosphodiesterase 1B(PDE1B)                                                    | 13.1 | 7.8  | 19.7 | 282 | 91.3 | 8.7  | 95.1 | 24.3 | 17.1 | 33.7 | 221 | 71.5 | 71.5 | 46.1 | immune system process            |
| PDI3A     | 2923      | protein disulfide isomerase family A member 3(PDI3A)                           | 7.8  | 3.6  | 12   | 250 | 80.9 | 80.9 | 26.5 | 18.4 | 11   | 29.4 | 79  | 25.6 | 25.6 | 87.3 | immune system process            |
| PDRG1     | 81572     | p53 and DNA damage regulated 1(PDRG1)                                          | 18.8 | 9.7  | 25.2 | 62  | 20.1 | 20.1 | 90.2 | 14.2 | 9.1  | 23.3 | 227 | 73.5 | 73.5 | 38.2 | muscle                           |
| PER1      | 5187      | period circadian clock 1(PER1)                                                 | 15.3 | 8.2  | 23.1 | 259 | 83.8 | 17.8 | 88.9 | 17.8 | 7.1  | 33   | 122 | 39.5 | 39.5 | 77.5 | inflammatory response            |
| PEX14     | 5195      | peroxisomal biogenesis factor 14(PEX14)                                        | 10.7 | 6.1  | 21.7 | 227 | 73.5 | 73.5 | 39.2 | 23.9 | 13.9 | 35   | 154 | 49.8 | 49.8 | 74.5 | cytoskeleton organization        |
| PFDN5     | 5204      | prefoldin subunit 5(PFDN5)                                                     | 9.4  | 0.3  | 17.8 | 132 | 42.7 | 42.7 | 65.7 | 15.2 | 1    | 26.2 | 130 | 42.1 | 42.1 | 72.5 | fibroblast                       |
| PHB       | 5245      | prohibitin(PHB)                                                                | 11.7 | 4.8  | 18.4 | 213 | 68.9 | 68.9 | 37.3 | 13.9 | 4.9  | 22   | 171 | 55.3 | 55.3 | 58.8 | inflammatory response            |
| PIN1      | 5300      | peptidylprolyl cis/trans isomerase, NIMA-interacting 1(PIN1)                   | 14.2 | 7.1  | 25.2 | 117 | 37.9 | 37.9 | 70.6 | 29.4 | 20.1 | 38.5 | 102 | 33   | 33   | 89.2 | MAPK cascade                     |
| PIP5K1C   | 23396     | phosphatidylinositol-4-phosphate 5-kinase type 1 gamma(PIP5K1C)                | 16.8 | 11.3 | 23.9 | 49  | 15.9 | 15.9 | 93.1 | 30.1 | 16.5 | 39.2 | 137 | 44.3 | 44.3 | 79.4 | immune system process            |
| PKN1      | 5585      | protein kinase N1(PKN1)                                                        | 9.4  | 4.9  | 15.2 | 197 | 63.8 | 63.8 | 47.1 | 26.9 | 12   | 39.5 | 136 | 44   | 44   | 79.4 | immune system process            |
| PLA2G4B   | 100137049 | phospholipase A2 group IVB(PLA2G4B)                                            | 9.1  | 4.2  | 20.7 | 172 | 55.7 | 55.7 | 52.9 | 6.8  | 3.2  | 18.4 | 118 | 38.2 | 38.2 | 73.5 | inflammatory response            |
| PLD3      | 23646     | phospholipase D family member 3(PLD3)                                          | 11.1 | 5.2  | 17.8 | 160 | 51.8 | 48.2 | 58.8 | 8.4  | 2.6  | 22.7 | 174 | 56.3 | 56.3 | 55.9 | lung                             |
| PLIN2     | 123       | perilipin 2(PLIN2)                                                             | 8.4  | 4.5  | 18.4 | 195 | 63.1 | 36.9 | 72.5 | 9.4  | 4.2  | 20.7 | 180 | 58.3 | 58.3 | 48   | lung                             |
| PLPPR3    | 79948     | phospholipid phosphatase related 3(PLPPR3)                                     | 14.6 | 5.2  | 23.9 | 218 | 70.6 | 70.6 | 42.2 | 16.8 | 6.8  | 30.4 | 145 | 46.9 | 46.9 | 75.5 | eye                              |
| PLPPR4    | 9890      | phospholipid phosphatase related 4(PLPPR4)                                     | 6.5  | 3.6  | 11.7 | 192 | 62.1 | 62.1 | 45.1 | 8.7  | 4.2  | 19.7 | 135 | 43.7 | 43.7 | 66.7 | lung                             |
| PMF1      | 11243     | polyamine modulated factor 1(PMF1)                                             | 6.1  | 1.9  | 14.9 | 198 | 64.1 | 64.1 | 42.2 | 8.1  | 2.9  | 21.7 | 213 | 68.9 | 68.9 | 47.1 | skin                             |
| PODXL2    | 50512     | podocalyxin like 2(PODXL2)                                                     | 14.3 | 5.5  | 23.4 | 170 | 55   | 54.9 | 53.5 | 28.5 | 20.7 | 37.2 | 102 | 33   | 33   | 88.2 | immune system process            |
| POLR2G    | 5436      | RNA polymerase II subunit G(POLR2G)                                            | 6.1  | 1.6  | 12.9 | 216 | 69.9 | 69.9 | 34.3 | 3.9  | 1.3  | 23.3 | 168 | 54.4 | 54.4 | 57.8 | apoptotic process                |
| ppf4      | 8497      | PTRF interacting protein alpha 4(PPF4)                                         | 9.7  | 3.2  | 15.2 | 134 | 43.4 | 56.6 | 50   | 15.2 | 5.8  | 23.6 | 121 | 39.2 | 39.2 | 72.5 | eye                              |
| PPP1R14A  | 94274     | protein phosphatase 1 regulatory inhibitor subunit 14A(PPP1R14A)               | 12.6 | 5.8  | 18.1 | 167 | 54   | 54   | 52.9 | 22   | 12.6 | 33.3 | 93  | 30.1 | 30.1 | 86.3 | NA                               |
| PPP1R15A  | 23645     | protein phosphatase 1 regulatory subunit 15A(PPP1R15A)                         | 10   | 5.8  | 16.5 | 32  | 10.4 | 89.6 | 17.6 | 10.4 | 6.5  | 17.2 | 100 | 32.4 | 32.4 | 76.5 | apoptotic process                |
| PPP1R9B   | 84687     | protein phosphatase 1 regulatory subunit 9B(PPP1R9B)                           | 9.7  | 3.9  | 18.1 | 124 | 40.1 | 40.1 | 67.6 | 7.1  | 3.2  | 13.9 | 145 | 46.9 | 53.1 | 52   | cytoskeleton organization        |
| PPP4R3B   | 57223     | protein phosphatase 4 regulatory subunit 3B(PPP4R3B)                           | 11   | 6.1  | 19.4 | 167 | 54   | 46   | 61.8 | 22.3 | 12   | 32.4 | 152 | 49.2 | 49.2 | 66.7 | cytoskeleton                     |
| PPPS5C    | 5536      | protein phosphatase 5 catalytic subunit(PPPS5C)                                | 12.4 | 8.1  | 20.1 | 15  | 4.9  | 95.1 | 10.8 | 19.1 | 10.7 | 28.8 | 151 | 48.9 | 48.9 | 65.7 | MAPK cascade                     |
| ppr1      | 23082     | peroxisome proliferator-activated receptor gamma, coactivator-related 1(PPRC1) | 13.3 | 6.5  | 20.4 | 57  | 18.4 | 81.6 | 27.5 | 10   | 5.5  | 18.4 | 164 | 53.1 | 53.1 | 54.9 | RNA recognition motif            |
| PRPF4B    | 8899      | pre-mRNA processing factor 4B(PRPF4B)                                          | 10.4 | 5.5  | 18.1 | 201 | 65   | 35   | 71.6 | 15.4 | 1.9  | 24.9 | 180 | 58.3 | 58.3 | 52   | lung                             |
| PSMA1     | 5682      | proteasome subunit alpha 1(PSMA1)                                              | 17.2 | 9.7  | 25.6 | 77  | 24.9 | 75.1 | 35.3 | 7.8  | 2.6  | 13.9 | 168 | 54.4 | 54.4 | 50   | inflammatory response            |
| PTPN2     | 5771      | protein tyrosine phosphatase, non-receptor type 2(PTPN2)                       | 12.9 | 5.8  | 20.7 | 160 | 51.8 | 51.8 | 54.5 | 27.2 | 19.8 | 36.3 | 151 | 48.9 | 43.2 | 76.9 | inflammatory response            |
| PTPN5     | 84867     | protein tyrosine phosphatase, non-receptor type 5(PTPN5)                       | 6.8  | 1    | 23.9 | 166 | 53.7 | 53.7 | 57.8 | 10   | 1.3  | 30.4 | 179 | 57.9 | 57.9 | 56.9 | eye                              |
| PUS7      | 54517     | pseudouridylate synthase 7 (putative)(PUS7)                                    | 9.7  | 5.2  | 16.8 | 188 | 60.8 | 60.8 | 49   | 19.2 | 10.7 | 28   | 129 | 41.7 | 41.4 | 79.4 | eye                              |
| PYCR1     | 5831      | pyrroline-5-carboxylate reductase 1(PYCR1)                                     | 14.2 | 9.1  | 20.4 | 205 | 66.3 | 33.7 | 77.5 | 11   | 5.5  | 16.8 | 154 | 49.8 | 49.8 | 56.9 | response to oxidative stress     |
| PYGB      | 5834      | phosphorylase, glycogen                                                        | 11.7 | 5.8  | 21.4 | 140 | 45.3 | 45.3 | 63.7 | 24.3 | 13.9 | 31.1 | 77  | 24.9 | 24.9 | 91.2 |                                  |
| QTRT1     | 81890     | queuine tRNA-ribosyltransferase catalytic subunit 1(QTRT1)                     | 16.8 | 10.7 | 23.9 | 60  | 19.4 | 19.4 | 88.2 | 19.1 | 9.4  | 27.5 | 67  | 21.7 | 21.7 | 88.2 | gene expression                  |
| RAB11FIP3 | 9727      | RAB11 family interacting protein 3(RAB11FIP3)                                  | 16.2 | 5.8  | 24.6 | 189 | 61.2 | 61.2 | 47.1 | 19.1 | 11.1 | 30.2 | 222 | 71.8 | 70.8 | 50   | cytoskeleton                     |
| RABEP1    | 9135      | rabaptin, RAB GTPase binding effector protein 1(RABEP1)                        | 22.5 | 11.3 | 29.8 | 241 | 78   | 22   | 91.2 | 10   | 3.2  | 19.1 | 129 | 41.7 | 41.7 | 65.7 | apoptotic process                |
| RABIF     | 5877      | RAB interacting factor(RABIF)                                                  | 17.8 | 8.7  | 33.3 | 222 | 71.8 | 28.2 | 87.3 | 11.7 | 1    | 25.2 | 91  | 29.4 | 29.4 | 81.4 | eye                              |
| RABL6     | 55684     | RAB, member RAS oncogene family-like 6(RABL6)                                  | 11   | 3.6  | 18.1 | 205 | 66.3 | 66.3 | 42.2 | 18.1 | 9.4  | 27.8 | 181 | 58.6 | 58.6 | 58.4 | lung                             |
| RAD50     | 10111     | RAD50 double strand break repair protein(RAD50)                                | 8.4  | 2.9  | 19.7 | 84  | 27.2 | 27.2 | 76.5 | 10   | 2.9  | 17.8 | 137 | 44.3 | 44.3 | 63.7 | nucleic acid binding             |
| RALY      | 22913     | RALY heterogeneous nuclear ribonucleoprotein(RALY)                             | 9.7  | 5.5  | 16.2 | 190 | 61.5 | 38.5 | 66.7 | 17.8 | 11.7 | 24.9 | 169 | 54.7 | 54.7 | 56.9 | RNA recognition motif            |
| RAPGEF2   | 9693      | Rap guanine nucleotide exchange factor 2(RAPGEF2)                              | 10.7 | 5.2  | 20.1 | 97  | 31.4 | 31.4 | 74.5 | 17.5 | 8.7  | 27.8 | 160 | 51.8 | 51.8 | 65.7 | MAPK cascade                     |
| RARRES2   | 5919      | retinoic acid receptor responder 2(RARRES2)                                    | 9.7  | 2.3  | 16.5 | 114 | 36.9 | 36.9 | 73.5 | 14.6 | 6.5  | 26.5 | 100 | 32.4 | 32.4 | 77.5 | inflammatory response            |
| RARS      | 5917      | arginyl-tRNA synthetase(RARS)                                                  | 8.4  | 3.2  | 20.1 | 158 | 51.1 | 51.1 | 57.8 | 16.2 | 5.5  | 24   | 114 | 36.9 | 36.9 | 75.5 | muscle                           |
| RBM26     | 64062     | RNA binding motif protein 26(RBM26)                                            | 7.8  | 4.2  | 17.5 | 108 | 35   | 35   | 72.5 | 23.6 | 9.4  | 33.3 | 167 | 54   | 54   | 62.7 | RNA recognition motif            |
| RBMS1     | 5937      | RNA binding motif single stranded interacting protein 1(RBMS1)                 | 16.8 | 9.7  | 25.2 | 239 | 77.3 | 22.7 | 86.3 | 31.7 | 25.6 | 38.5 | 87  | 28.2 | 28.2 | 95.1 | muscle                           |
| RDH16     | 8608      | retinol dehydrogenase 16 (all-trans)(RDH16)                                    | 9.4  | 4.5  | 20.4 | 92  | 29.8 | 29.8 | 78.4 | 9.4  | 4.9  | 22.7 | 123 | 39.8 | 39.8 | 73.5 | retinol metabolic process        |
| RDX       | 5962      | radixin(RDX)                                                                   | 14.9 | 6    | 22.4 | 236 | 76.4 | 23.6 | 82.4 | 13.3 | 7.1  | 19.2 | 142 | 46   | 46   | 59.8 | cytoskeleton organization        |
| RFFL      | 117584    | ring finger and FYVE like domain containing E3 ubiquitin protein ligase(RFFL)  | 13.3 | 6.5  | 18.8 | 149 | 48.2 | 48.2 | 57.8 | 22.3 | 10.7 | 31.1 | 178 | 57.6 | 57.6 | 58.8 | apoptotic process                |
| RHOB      | 388       | ras homolog family member B(RHOB)                                              | 6.8  | 3.2  | 15.2 | 203 | 65.7 | 65.7 | 44.1 | 15.9 | 7.4  | 27.5 | 166 | 53.7 | 53.7 | 60.8 | apoptotic process                |
| RNASET2   | 8635      | ribonuclease T2(RNASET2)                                                       | 15.9 | 9.7  | 23.9 | 246 | 79.6 | 20.4 | 87.3 | 13.6 | 6.5  | 26.9 | 196 | 63.4 | 63.4 | 48   | extracellular exosome            |
| RNF130    | 55819     | ring finger protein 130(RNF130)                                                | 8.7  | 3.2  | 18.4 | 228 | 73.8 | 73.8 | 33.3 | 19.7 | 10.7 | 38.2 | 107 | 34.6 | 34.6 | 86.3 | apoptotic process                |
| ROBO1     | 6091      | roundabout guidance receptor 1(ROBO1)                                          | 8.7  | 3.9  | 15.9 | 74  | 23.9 | 76.1 | 36.3 | 9.7  | 3.9  | 15.5 | 85  | 27.5 | 72.5 | 38.2 | apoptotic process                |
| RPL15     | 6138      | ribosomal protein L15(RPL15)                                                   | 7.8  | 2.6  | 15.5 | 118 | 38.2 | 38.2 | 64.7 | 12.3 | 3.9  | 25.2 | 141 | 45.6 | 45.6 | 64.7 | lung                             |
| RPL21     | 6144      | ribosomal protein L21(RPL21)                                                   | 9.4  | 2.9  | 16.8 | 115 | 37.2 | 37.2 | 68.6 | 12.3 | 3.9  | 20.3 | 107 | 34.6 | 34.6 | 74.5 | muscle                           |
| RPL30     | 6156      | ribosomal protein L30(RPL30)                                                   | 11.3 | 6.5  | 20.4 | 60  | 19.4 | 80.6 | 24.5 | 13.6 | 7.1  | 22   | 141 | 45.6 | 45.6 | 63.7 | extracellular matrix             |
| RPRM      | 56475     | represso, TPS3 dependent G2 arrest mediator candidate(RPRM)                    | 15.2 | 7.8  | 25.2 | 73  | 23.6 | 23.6 | 85.3 | 32   | 23.9 | 42.1 | 141 | 45.6 | 45.6 | 80.4 | lung                             |
| RPS2      | 6187      | ribosomal protein S2(RPS2)                                                     | 14.6 | 7.8  | 21.3 | 260 | 84.1 | 15.9 | 89.2 | 15.2 | 8.1  | 29.8 | 154 | 49.8 | 49.8 | 62.7 | lung                             |
| RPS3      | 6188      | ribosomal protein S3(RPS3)                                                     | 12   | 6.8  | 26.2 | 152 | 49.2 | 49.2 | 66.7 | 16.2 | 9.4  | 26.5 | 100 | 32.4 | 32.4 | 81.4 | MAPK cascade                     |
| RRP1B     | 23076     | ribosomal RNA processing 1B(RRP1B)                                             | 9.1  | 1.6  | 18.1 | 178 | 57.6 | 57.6 | 53.9 | 23.6 | 14.9 | 35   | 97  | 31.4 | 31.4 | 86.3 | RNA binding                      |
| RTEL1     | 51750     | regulator of telomere elongation helicase 1(RTEL1)                             | 13.9 | 5    | 22   | 167 | 54   | 54.8 | 51.6 | 18.8 | 7.1  | 27.2 | 151 | 48.9 | 48.9 | 66.7 | lung                             |
| RWDD1     | 51389     | RWD domain containing 1(RWDD1)                                                 | 12.9 | 6.1  | 19.1 | 230 | 74.4 | 25.6 | 79.4 | 9.4  | 5.5  | 17.2 | 162 | 52.4 | 47.6 | 59.8 | bone                             |
| S100A11   | 6282      | S100 calcium binding protein A11(S100A11)                                      | 10   | 3.9  | 17.2 | 117 | 37.9 | 37.9 | 69.6 | 13.3 | 7.1  | 20.1 | 184 | 59.5 | 59.5 | 48   | lung                             |

|           |        |                                                                                          |      |      |      |     |      |      |      |      |      |      |     |      |      |      |                              |
|-----------|--------|------------------------------------------------------------------------------------------|------|------|------|-----|------|------|------|------|------|------|-----|------|------|------|------------------------------|
| SAMD13    | 148418 | sterile alpha motif domain containing 13(SAMD13)                                         | 7,8  | 3,2  | 13,9 | 86  | 27,8 | 27,8 | 76,5 | 9,7  | 5,5  | 14,6 | 38  | 12,3 | 87,7 | 18,6 | salivary gland               |
| SARNP     | 84324  | SAP domain containing ribonucleoprotein(SARNP)                                           | 14,6 | 9,4  | 19,8 | 271 | 87,7 | 12,3 | 95,1 | 13,3 | 7,8  | 21   | 235 | 76,1 | 76,1 | 34,3 | RNA binding                  |
| SART1     | 9092   | squamous cell carcinoma antigen recognized by T-cells 1(SART1)                           | 12,4 | 5,8  | 21,4 | 98  | 31,7 | 31,7 | 76,5 | 21,7 | 11,7 | 29,6 | 77  | 24,9 | 24,9 | 88,2 | immune system process        |
| SATB1     | 6304   | SATB homeobox 1(SATB1)                                                                   | 18,4 | 10,4 | 25,6 | 64  | 20,7 | 20,7 | 89,2 | 13,9 | 8,1  | 23,3 | 108 | 35   | 35   | 74,5 | immune system process        |
| SCAF1     | 58506  | SR-related CTD associated factor 1(SCAF1)                                                | 12,3 | 3,6  | 20,7 | 129 | 41,7 | 41,7 | 67,6 | 17,2 | 3,9  | 30,7 | 146 | 47,2 | 47,2 | 66,7 | lung                         |
| SCAP      | 22937  | SREBF chaperone(SCAP)                                                                    | 10,7 | 5,2  | 15,9 | 95  | 30,7 | 69,3 | 38,2 | 9,4  | 2,3  | 26,9 | 164 | 53,1 | 53,1 | 56,9 | gene expression              |
| SCFD1     | 23256  | sec1 family domain containing 1(SCFD1)                                                   | 12   | 7,1  | 18,1 | 89  | 28,8 | 71,2 | 39,2 | 8,7  | 4,9  | 16,5 | 172 | 55,7 | 55,7 | 56,9 | autophagy                    |
| SCRIB     | 23513  | scribbled planar cell polarity protein(SCRIB)                                            | 7,8  | 3,2  | 17,2 | 175 | 56,6 | 56,6 | 49   | 9,4  | 4,2  | 21,7 | 208 | 67,3 | 67,3 | 45,1 | apoptotic process            |
| SDA1      | 55153  | SDA1 domain containing 1(SDA1)                                                           | 11   | 5,8  | 18,8 | 137 | 44,3 | 44,3 | 62,7 | 13,3 | 8,1  | 20,1 | 167 | 54   | 54   | 55,9 | cytoskeleton organization    |
| SDHAF1    | 644096 | succinate dehydrogenase complex assembly factor 1(SDHAF1)                                | 10,4 | 5,5  | 17,2 | 136 | 44   | 56   | 50   | 25,9 | 17,2 | 35,6 | 92  | 29,8 | 29,8 | 88,2 | bone                         |
| SEC23B    | 10483  | Sec23 homolog B, coat complex II component(SEC23B)                                       | 7,8  | 3,9  | 12,9 | 171 | 55,3 | 55,3 | 49   | 10,5 | 2,9  | 26,5 | 113 | 36,6 | 36,6 | 76,5 | pituitary gland              |
| SERPINA3  | 12     | serpin family A member 3(SERPINA3)                                                       | 11,4 | 4,5  | 21   | 150 | 48,5 | 51,5 | 57,8 | 6,8  | 1,9  | 22,3 | 127 | 41,1 | 41,1 | 68,6 | inflammatory response        |
| SET       | 6418   | SET nuclear proto-oncogene(SET)                                                          | 9,7  | 2,9  | 14,9 | 117 | 37,9 | 37,9 | 74,5 | 12   | 3,9  | 23,6 | 136 | 44   | 44   | 69,6 | apoptotic process            |
| SHF       | 90525  | Src homology 2 domain containing F(SHF)                                                  | 10   | 4,5  | 21,7 | 208 | 67,3 | 67,3 | 44,1 | 13,9 | 5,5  | 34,6 | 121 | 39,2 | 39,2 | 80,4 | apoptotic process            |
| SIGIRR    | 59307  | single Ig and TIR domain containing(SIGIRR)                                              | 14,2 | 5,5  | 23,9 | 158 | 51,1 | 51,1 | 57,8 | 33,3 | 24,3 | 42,7 | 140 | 45,3 | 45,3 | 80,4 | inflammatory response        |
| SLC1A3    | 6507   | solute carrier family 1 member 3(SLC1A3)                                                 | 7,4  | 2,6  | 14,9 | 125 | 40,5 | 40,5 | 65,7 | 9,7  | 2,9  | 23,3 | 122 | 39,5 | 39,5 | 72,5 | lung                         |
| slc35a1   | 10559  | solute carrier family 35 member A1(SLC35A1)                                              | 9,7  | 3,9  | 16,8 | 154 | 49,8 | 49,8 | 56,9 | 14,9 | 8,4  | 29,8 | 170 | 55   | 55   | 59,8 | lung                         |
| SMG1P2    | 440354 | SMG1P2, nonsense mediated mRNA decay associated PI3K related kinase pseudogene 2(SMG1P2) | 11,8 | 4,1  | 24,1 | 248 | 80,3 | 19,7 | 87,3 | 11   | 5,8  | 20,7 | 196 | 63,4 | 63,4 | 46,1 | NA                           |
| SMIM12    | 113444 | small integral membrane protein 12(SMIM12)                                               | 12,3 | 7,8  | 24,9 | 103 | 33,3 | 33,3 | 75,5 | 19,4 | 12,6 | 25,9 | 62  | 20,1 | 20,1 | 90,2 | lung                         |
| SNAP47    | 116841 | synaptosome associated protein 47(SNAP47)                                                | 7,1  | 3,2  | 12   | 199 | 64,4 | 64,4 | 41,2 | 11,7 | 6,1  | 19,1 | 86  | 27,8 | 27,8 | 79,4 | lung                         |
| SNRNP70   | 6625   | small nuclear ribonucleoprotein U1 subunit 70(SNRNP70)                                   | 14,2 | 6,8  | 22,9 | 250 | 80,9 | 19,1 | 87,3 | 25,9 | 14,2 | 37   | 141 | 45,6 | 45,6 | 76,5 | autophagy                    |
| SNRPB     | 6628   | small nuclear ribonucleoprotein polypeptides B and B1(SNRPB)                             | 8,1  | 4,5  | 14,6 | 18  | 5,8  | 5,8  | 98   | 21,8 | 14,6 | 36,3 | 107 | 34,6 | 34,6 | 84,3 | lung                         |
| SOD2      | 6648   | superoxide dismutase 2, mitochondrial(SOD2)                                              | 13,6 | 6,8  | 20,4 | 159 | 51,5 | 51,5 | 53,9 | 15,5 | 6,5  | 22   | 152 | 49,2 | 49,2 | 58,8 | immune system process        |
| SPECC1    | 92521  | sperm antigen with calponin homology and coiled-coil domains 1(SPECC1)                   | 10,4 | 5,4  | 21,7 | 138 | 44,7 | 55,3 | 53,9 | 20,4 | 9,4  | 28,2 | 101 | 32,7 | 32,7 | 80,4 | cytoskeleton organization    |
| SPEG      | 10290  | SPEG complex locus(SPEG)                                                                 | 11   | 4,8  | 23,3 | 79  | 25,6 | 25,6 | 82,4 | 13,9 | 7,1  | 29,2 | 183 | 59,2 | 59,2 | 58,8 | Arg rich                     |
| SPNS1     | 83985  | sphingolipid transporter 1 (putative)(SPNS1)                                             | 10   | 4,5  | 16,5 | 184 | 59,5 | 59,5 | 52   | 19,7 | 11,3 | 31,4 | 147 | 47,6 | 47,6 | 73,5 | skin                         |
| SPTB      | 6710   | spectrin beta, erythrocytic(SPTB)                                                        | 11   | 6,2  | 21,4 | 119 | 38,5 | 38,3 | 69,6 | 11,3 | 7,1  | 19,1 | 211 | 68,3 | 68,3 | 45,1 | MAPK cascade                 |
| SPTBN2    | 6712   | spectrin beta, non-erythrocytic 2(SPTBN2)                                                | 13,9 | 6,5  | 24   | 227 | 73,5 | 26,5 | 81,4 | 13,6 | 1,9  | 22,7 | 188 | 60,8 | 60,8 | 45,1 | immune system process        |
| SPTBN2    | 6712   | spectrin beta, non-erythrocytic 2(SPTBN2)                                                | 7,1  | 2,6  | 15,2 | 161 | 52,1 | 52,1 | 57,8 | 28,8 | 17,8 | 36,3 | 97  | 31,4 | 31,4 | 89,2 | immune system process        |
| SRGAP1    | 57522  | SLIT-ROBO Rho GTPase activating protein 1(SRGAP1)                                        | 11,7 | 5,5  | 18,4 | 193 | 62,5 | 62,5 | 45,1 | 12,6 | 4,5  | 25,9 | 136 | 44   | 44   | 69,6 | bone                         |
| SRGAP1    | 57522  | SLIT-ROBO Rho GTPase activating protein 1(SRGAP1)                                        | 12   | 5,5  | 19,7 | 158 | 51,1 | 51,1 | 60,8 | 13,6 | 3,6  | 25,3 | 130 | 42,1 | 42,1 | 73,5 | bone                         |
| SRSF7     | 6432   | serine and arginine rich splicing factor 7(SRSF7)                                        | 12,3 | 7,1  | 18,8 | 13  | 4,2  | 95,8 | 9,8  | 11,3 | 1,3  | 20,4 | 135 | 43,7 | 43,7 | 68,6 | skin                         |
| SSB       | 6741   | Sjogren syndrome antigen B(SSB)                                                          | 14,1 | 7,4  | 23,3 | 79  | 25,6 | 25,6 | 81,4 | 16,8 | 10,7 | 22   | 177 | 57,3 | 57,3 | 52   | RNA recognition motif        |
| SSBP2     | 23635  | single stranded DNA binding protein 2(SSBP2)                                             | 12,9 | 3,6  | 22   | 151 | 48,9 | 48,9 | 57,8 | 16,2 | 2,9  | 26,5 | 186 | 60,2 | 60,2 | 57,8 | blood                        |
| SSX2IP    | 117178 | SSX family member 2 interacting protein(SSX2IP)                                          | 16,2 | 5,5  | 26,2 | 166 | 53,7 | 53,7 | 55,9 | 21,7 | 10,7 | 33   | 144 | 46,6 | 46,6 | 73,5 | cytoskeleton organization    |
| STK17B    | 9262   | serine/threonine kinase 17b(STK17B)                                                      | 5,8  | 2,6  | 11,7 | 187 | 60,5 | 60,5 | 51   | 8,1  | 3,2  | 14,6 | 228 | 73,8 | 73,8 | 47,1 | apoptotic process            |
| SUB1      | 10923  | SUB1 homolog, transcriptional regulator(SUB1)                                            | 12,6 | 7,1  | 17,8 | 138 | 44,7 | 44,7 | 67,6 | 15,9 | 6,5  | 25,9 | 113 | 36,6 | 36,6 | 78,4 | lung                         |
| SUGT1     | 10910  | SGT1 homolog, MIS12 kinetochore complex assembly cochaperone(SUGT1)                      | 17,8 | 8,7  | 25,9 | 58  | 18,8 | 18,8 | 90,2 | 19,4 | 5,8  | 30,1 | 143 | 46,3 | 46,3 | 69,6 | salivary gland               |
| SUMO2     | 6613   | small ubiquitin-like modifier 2(SUMO2)                                                   | 10,7 | 4,5  | 16,5 | 121 | 39,2 | 39,2 | 65,7 | 14,9 | 6,8  | 25,9 | 140 | 45,3 | 45,3 | 71,6 | proteolysis                  |
| sumo3     | 6612   | small ubiquitin-like modifier 3(SUMO3)                                                   | 9,7  | 5,2  | 15,5 | 137 | 44,3 | 44,3 | 64,7 | 15,5 | 6,5  | 25,6 | 117 | 37,9 | 37,9 | 72,5 | lung                         |
| SYT5      | 6861   | synaptotagmin 5(SYT5)                                                                    | 9,7  | 3,6  | 18,4 | 167 | 54   | 54   | 50   | 6,1  | 1,9  | 23,9 | 94  | 30,4 | 30,4 | 77,5 | signaling                    |
| TBCA      | 6902   | tubulin folding cofactor A(TBCA)                                                         | 10   | 5,3  | 16,2 | 125 | 40,5 | 59,5 | 52,9 | 9,7  | 4,2  | 15,2 | 131 | 42,4 | 42,4 | 52,9 | extracellular exosome        |
| TBCC      | 6903   | tubulin folding cofactor C(TBCC)                                                         | 12,3 | 5,2  | 22,3 | 101 | 32,7 | 32,7 | 73,5 | 27,5 | 19,1 | 35,6 | 116 | 37,5 | 37,5 | 81,4 | lung                         |
| TCOF1     | 6949   | treacle ribosome biogenesis factor 1(TCOF1)                                              | 18,4 | 7,8  | 26,2 | 121 | 39,2 | 39,2 | 75,5 | 15,5 | 8,7  | 25,2 | 143 | 46,3 | 46,3 | 70,6 | eye                          |
| TEPSIN    | 146705 | TEPSIN, adaptor related protein complex 4 accessory protein(TEPSIN)                      | 10,7 | 5,5  | 19,7 | 148 | 47,9 | 52,1 | 55,9 | 10   | 4,5  | 14,6 | 146 | 47,2 | 47,2 | 61,8 | NA                           |
| TF        | 7018   | transferrin(TF)                                                                          | 7,4  | 2,3  | 12,3 | 192 | 62,1 | 62,1 | 42,2 | 20,8 | 10,1 | 28,5 | 74  | 23,9 | 23,9 | 88,2 | extracellular exosome        |
| TIMM10B   | 26515  | translocase of inner mitochondrial membrane 10B(TIMM10B)                                 | 18,4 | 10,4 | 26,5 | 134 | 43,4 | 43,4 | 70,6 | 18,4 | 10   | 25,9 | 127 | 41,1 | 41,1 | 69,6 | mitochondrion                |
| TINAGL1   | 64129  | tubulointerstitial nephritis antigen like 1(TINAGL1)                                     | 8,7  | 3,6  | 14,6 | 140 | 45,3 | 45,3 | 60   | 18,4 | 9,1  | 26,9 | 175 | 56,6 | 56,6 | 53,9 | immune system process        |
| TMEM189   | 387521 | transmembrane protein 189(TMEM189)                                                       | 7,4  | 2,9  | 17,2 | 175 | 56,6 | 56,6 | 49   | 7,4  | 2,9  | 14,6 | 131 | 42,4 | 42,4 | 69,6 | muscle                       |
| TMEM2     | 23670  | transmembrane protein 2(TMEM2)                                                           | 8,1  | 1,3  | 13   | 175 | 56,6 | 56,6 | 48   | 12,6 | 3,6  | 21,7 | 169 | 54,7 | 54,7 | 60,8 | extracellular exosome        |
| TMSB4X    | 7114   | thymosin beta 4, X-linked(TMSB4X)                                                        | 12,4 | 6,2  | 19,7 | 131 | 42,4 | 57,6 | 52,9 | 12   | 6,1  | 19,1 | 157 | 50,8 | 50,8 | 52,9 | cytoskeleton organization    |
| TNF       | 7124   | tumor necrosis factor(TNF)                                                               | 5,5  | 2,6  | 12   | 160 | 51,8 | 51,8 | 52,9 | 5,8  | 2,9  | 14,6 | 227 | 73,5 | 73,5 | 34,3 | inflammatory response        |
| TNF       | 7124   | tumor necrosis factor(TNF)                                                               | 11,4 | 4,9  | 19,4 | 151 | 48,9 | 51,1 | 57,8 | 11,7 | 5,5  | 17,2 | 30  | 9,7  | 9,7  | 17,6 | inflammatory response        |
| TNFRSF10B | 8795   | TNF receptor superfamily member 10b(TNFRSF10B)                                           | 11,7 | 5,8  | 21,7 | 163 | 52,8 | 52,8 | 61,8 | 18,8 | 12,6 | 29,4 | 163 | 52,8 | 52,8 | 62,7 | inflammatory response        |
| TOMM20    | 9804   | translocase of outer mitochondrial membrane 20(TOMM20)                                   | 9,1  | 4,2  | 18,4 | 206 | 66,7 | 66,7 | 41,2 | 27,2 | 14,6 | 34,3 | 91  | 29,4 | 29,4 | 89,2 | autophagy                    |
| TONSL     | 4796   | tonsoku-like, DNA repair protein(TONSL)                                                  | 10,4 | 6,1  | 18,4 | 111 | 35,9 | 64,1 | 41,2 | 10   | 4,2  | 16,8 | 112 | 36,2 | 63,8 | 41,2 | histone binding              |
| TPX2      | 22974  | TPX2, microtubule nucleation factor(TPX2)                                                | 13,3 | 7,8  | 21   | 170 | 55   | 55   | 54,9 | 13,4 | 7,4  | 26,2 | 173 | 56   | 56   | 59,8 | apoptotic process            |
| TRA2B     | 6434   | transformer 2 beta homolog (Drosophila)(TRA2B)                                           | 10,4 | 3,6  | 17,2 | 156 | 50,5 | 50,5 | 55,9 | 38,2 | 28,2 | 47,9 | 135 | 43,7 | 43,7 | 87,3 | response to oxidative stress |
| TRA2B     | 6434   | transformer 2 beta homolog (Drosophila)(TRA2B)                                           | 11   | 4,2  | 18,1 | 96  | 31,1 | 31,1 | 76,5 | 25,2 | 7,1  | 38,5 | 155 | 50,2 | 50,2 | 71,6 | response to oxidative stress |
| TRADD     | 8717   | TNFRSF1A associated via death domain(TRADD)                                              | 7,4  | 1,9  | 16,8 | 87  | 28,2 | 28,2 | 75,5 | 3,2  | 24,9 | 39,5 | 98  | 31,7 | 31,7 | 92,2 | apoptotic process            |
| TRIM17    | 51127  | tripartite motif containing 17(TRIM17)                                                   | 7,8  | 1    | 19,4 | 131 | 42,4 | 42,4 | 64,7 | 18,4 | 6,5  | 24,6 | 130 | 42,1 | 42,1 | 69,6 | autophagy                    |
| TRIM37    | 4591   | tripartite motif containing 37(TRIM37)                                                   | 19,7 | 13,3 | 31,1 | 218 | 70,6 | 29,4 | 84,3 | 18,2 | 11,7 | 29,8 | 192 | 62,1 | 37,9 | 77,5 | cytoskeleton organization    |
| TRIM41    | 90933  | tripartite motif containing 41(TRIM41)                                                   | 12,6 | 6,1  | 19,7 | 155 | 50,2 | 50,2 | 55,9 | 12   | 4,9  | 20,1 | 253 | 81,9 | 81,9 | 28,4 | lung                         |
| TRIO      | 7204   | trio Rho guanine nucleotide exchange factor(TRIO)                                        | 7,4  | 2,6  | 14   | 123 | 39,8 | 60,2 | 45,1 | 8,1  | 2,6  | 13,3 | 117 | 37,9 | 62,1 | 45,1 | apoptotic process            |
| TRIP10    | 9322   | thyroid hormone receptor interactor 10(TRIP10)                                           | 7,8  | 1,9  | 17,8 | 115 | 37,2 | 37,2 | 68,6 | 18,4 | 9,4  | 26,9 | 137 | 44,3 | 44,3 | 67,6 | cytoskeleton organization    |
| TRMO      | 51531  | tRNA methyltransferase O(TRMO)                                                           | 13   | 5,3  | 21,7 | 157 | 50,8 | 49,2 | 57,8 | 12,9 | 6,1  | 17,8 | 273 | 88,3 | 11,7 | 93,1 | lung                         |
| TTC28     | 23331  | tetratricopeptide repeat domain 28(TTC28)                                                | 15,2 | 7,4  | 22,3 | 226 | 73,1 | 73,1 | 34,3 | 17,5 | 10,4 | 28,8 | 114 | 36,9 | 36,9 | 77,5 | blood                        |
| TLL12     | 23170  | tubulin tyrosine ligase like 12(TLL12)                                                   | 18,5 | 10,1 | 23,2 | 62  | 20,1 | 17,1 | 93,9 | 18,4 | 9,7  | 28,5 | 211 | 68,3 | 68,3 | 50   | innate immune response       |
| TUBB      | 203068 | tubulin beta class I(TUBB)                                                               | 7,8  | 2,6  | 15,2 | 225 | 72,8 | 72,8 | 40,2 | 9,4  | 4,5  | 20,7 | 242 | 78,3 | 78,3 | 38,2 | immune system process        |
| UBALD2    | 283991 | UBA like domain containing 2(UBALD2)                                                     | 10   | 3,9  | 19,4 | 161 | 52,1 | 52,1 | 62,7 | 10,4 | 4,5  | 21,4 | 133 | 43   | 43   | 68,6 | NA                           |

|        |        |                                                                   |      |     |      |     |      |      |      |      |      |      |     |      |      |      |                           |
|--------|--------|-------------------------------------------------------------------|------|-----|------|-----|------|------|------|------|------|------|-----|------|------|------|---------------------------|
| UBALD2 | 283991 | UBA like domain containing 2(UBALD2)                              | 11,3 | 4,4 | 22,7 | 154 | 49,8 | 49,8 | 63,7 | 11   | 4,5  | 24,3 | 149 | 48,2 | 48,2 | 63,7 | NA                        |
| UBALD2 | 283991 | UBA like domain containing 2(UBALD2)                              | 9,1  | 4,5 | 18,1 | 108 | 35   | 65   | 41,2 | 16,8 | 3,6  | 27,2 | 67  | 21,7 | 21,7 | 87,3 | NA                        |
| UBAP1  | 51271  | ubiquitin associated protein 1(UBAP1)                             | 7,8  | 3,6 | 13,3 | 128 | 41,4 | 41,4 | 63,7 | 8,1  | 4,2  | 13,6 | 202 | 65,4 | 65,4 | 46,3 | proteolysis               |
| UBE2F  | 140739 | ubiquitin conjugating enzyme E2 F (putative)(UBE2F)               | 12,3 | 7,4 | 22,3 | 144 | 46,6 | 46,6 | 60,8 | 27,8 | 19,1 | 36,9 | 97  | 31,4 | 31,4 | 89,2 | bone                      |
| UBE2M  | 9040   | ubiquitin conjugating enzyme E2 M(UBE2M)                          | 9,7  | 5,8 | 17,5 | 19  | 6,1  | 6,1  | 98   | 10   | 4,9  | 20,4 | 115 | 37,2 | 37,2 | 72,5 | apoptotic process         |
| UBE2M  | 9040   | ubiquitin conjugating enzyme E2 M(UBE2M)                          | 13   | 7,4 | 21,7 | 194 | 62,8 | 37,2 | 71,6 | 12,6 | 7,1  | 25,3 | 107 | 34,6 | 34,6 | 74,5 | apoptotic process         |
| UBL7   | 84993  | ubiquitin like 7(UBL7)                                            | 8,4  | 4,5 | 13,6 | 161 | 52,1 | 51,9 | 57,8 | 13,6 | 4,9  | 21   | 198 | 64,1 | 64,1 | 52,9 | eye                       |
| UBQLN1 | 29979  | ubiquilin 1(UBQLN1)                                               | 8,4  | 4,2 | 13,9 | 118 | 38,2 | 61,8 | 46,1 | 13,3 | 3,2  | 28,8 | 78  | 25,2 | 25,2 | 86,3 | immune system process     |
| UBXN11 | 91544  | UBX domain protein 11(UBXN11)                                     | 11   | 1,9 | 17,5 | 214 | 69,3 | 69,3 | 35,3 | 19,4 | 6,8  | 36,6 | 106 | 34,3 | 34,3 | 85,3 | proteolysis               |
| UCHL1  | 7345   | ubiquitin C-terminal hydrolase L1(UCHL1)                          | 9,5  | 4,2 | 20,7 | 130 | 42,1 | 42,1 | 67,6 | 13,6 | 6,8  | 19,1 | 195 | 63,1 | 63,1 | 49   | MAPK cascade              |
| Uqcrb  | 7381   | ubiquinol-cytochrome c reductase binding protein(UQCRB)           | 13,3 | 1,6 | 21   | 205 | 66,3 | 66,3 | 41,2 | 11   | 1    | 21,7 | 104 | 33,7 | 33,7 | 74,5 | fibroblast                |
| USE1   | 55850  | unconventional SNARE in the ER 1(USE1)                            | 10,4 | 4,9 | 24,6 | 236 | 76,4 | 23,6 | 84,3 | 15,5 | 8,1  | 25,9 | 193 | 62,5 | 62,5 | 50   | bone                      |
| USP48  | 84196  | ubiquitin specific peptidase 48(USP48)                            | 12,4 | 4,9 | 19,6 | 160 | 51,8 | 51,3 | 53,9 | 22   | 12   | 27,8 | 171 | 55,3 | 55,3 | 61,8 | proteolysis               |
| USP7   | 7874   | ubiquitin specific peptidase 7(USP7)                              | 5,5  | 1   | 15,5 | 152 | 49,2 | 49,2 | 55,9 | 9,4  | 1,3  | 20,7 | 148 | 47,9 | 47,9 | 64,7 | proteolysis               |
| VARS2  | 57176  | valyl-tRNA synthetase 2, mitochondrial(VARS2)                     | 6,5  | 1,6 | 14,9 | 175 | 56,6 | 56,6 | 48   | 16,2 | 7,1  | 29,8 | 185 | 59,9 | 59,9 | 58,8 | eye                       |
| VCAM1  | 7412   | vascular cell adhesion molecule 1(VCAM1)                          | 11,3 | 5,5 | 23,9 | 232 | 75,1 | 24,9 | 81,4 | 29,8 | 17,2 | 39,8 | 124 | 40,1 | 40,1 | 82,4 | inflammatory response     |
| VDAC1  | 7416   | voltage dependent anion channel 1(VDAC1)                          | 11   | 1,6 | 17,5 | 164 | 53,1 | 53,1 | 56,9 | 16,5 | 3,9  | 29,1 | 124 | 40,1 | 40,1 | 77,5 | apoptotic process         |
| VIM    | 7431   | vimentin(VIM)                                                     | 11,3 | 4,2 | 23,3 | 174 | 56,3 | 56,3 | 53,9 | 17,5 | 2,9  | 31,4 | 173 | 56   | 56   | 62,7 | cytoskeleton organization |
| VP54A  | 27183  | vacuolar protein sorting 4 homolog A(VPS4A)                       | 8,1  | 3,2 | 19,1 | 138 | 44,7 | 44,7 | 61,8 | 25,2 | 18,1 | 32,4 | 70  | 22,7 | 22,7 | 94,1 | autophagy                 |
| WDR34  | 89891  | WD repeat domain 34(WDR34)                                        | 5,5  | 2,3 | 19,4 | 195 | 63,1 | 63,1 | 46,1 | 13,6 | 1,6  | 21,7 | 137 | 44,3 | 44,3 | 63,7 | lung                      |
| WDR44  | 54521  | WD repeat domain 44(WDR44)                                        | 9,4  | 4,2 | 19,4 | 210 | 68   | 68   | 43,1 | 8,1  | 3,2  | 18,4 | 206 | 66,7 | 66,7 | 44,1 | endosomal membrane        |
| WDR54  | 84058  | WD repeat domain 54(WDR54)                                        | 11,1 | 5,2 | 17,9 | 84  | 27,2 | 72,8 | 35,3 | 9,7  | 3,9  | 18,8 | 161 | 52,1 | 52,1 | 53,9 | skin                      |
| WDR73  | 84942  | WD repeat domain 73(WDR73)                                        | 8,7  | 4,9 | 16,5 | 154 | 49,8 | 49,8 | 53,9 | 21   | 6,5  | 36,9 | 106 | 34,3 | 34,3 | 85,3 | lung                      |
| WWC2   | 80014  | WW and C2 domain containing 2(WWC2)                               | 10   | 4,5 | 18,8 | 203 | 65,7 | 34,3 | 76,5 | 10,4 | 2,9  | 18,4 | 229 | 74,1 | 74,1 | 34,3 | skin                      |
| XRCC4  | 7518   | X-ray repair cross complementing 4(XRCC4)                         | 8,7  | 4,2 | 20,1 | 151 | 48,9 | 51,1 | 54,9 | 10,4 | 5,2  | 15,9 | 24  | 7,8  | 92,2 | 11,8 | eye                       |
| YAF2   | 10138  | YY1 associated factor 2(YAF2)                                     | 13,9 | 6,8 | 21,7 | 263 | 85,1 | 14,9 | 90,2 | 16,2 | 10   | 23,6 | 47  | 15,2 | 15,2 | 93,1 | gene expression           |
| ZAP70  | 7535   | zeta chain of T cell receptor associated protein kinase 70(ZAP70) | 5,8  | 2,6 | 10,7 | 193 | 62,5 | 62,5 | 50   | 10   | 5,5  | 18,8 | 197 | 63,8 | 63,8 | 52,9 | inflammatory response     |
| zbtb18 | 10472  | zinc finger and BTB domain containing 18(ZBTB18)                  | 9,4  | 4,9 | 14,9 | 176 | 57   | 43   | 62,7 | 10   | 5,5  | 20,7 | 188 | 60,8 | 39,2 | 64,7 | cytoskeleton              |
| ZBTB8A | 653121 | zinc finger and BTB domain containing 8A(ZBTB8A)                  | 14,7 | 7,1 | 22,9 | 179 | 57,9 | 44,4 | 67   | 12,1 | 4,6  | 19,6 | 35  | 11,3 | 10,5 | 92,1 | nucleic acid binding      |
| ZMAT1  | 84460  | zinc finger matrin-type 1(ZMAT1)                                  | 6,8  | 1   | 12,6 | 209 | 67,6 | 67,6 | 36,3 | 5,8  | 2,3  | 12,6 | 115 | 37,2 | 37,2 | 70,6 | apoptotic process         |
| ZNF148 | 7707   | zinc finger protein 148(ZNF148)                                   | 11,7 | 5,8 | 21,4 | 122 | 39,5 | 39,5 | 73,5 | 13,3 | 5,2  | 21,7 | 179 | 57,9 | 57,9 | 57,8 | defense response          |
| ZNF24  | 7572   | zinc finger protein 24(ZNF24)                                     | 8,1  | 4,2 | 14,6 | 227 | 73,5 | 73,5 | 35,3 | 12,6 | 7,1  | 20,1 | 212 | 68,6 | 68,6 | 41,2 | lung                      |
| ZNF254 | 9534   | zinc finger protein 254(ZNF254)                                   | 12,6 | 5,5 | 19,7 | 146 | 47,2 | 52,8 | 52,9 | 10,4 | 6,1  | 17,2 | 199 | 64,4 | 64,4 | 44,1 | nucleic acid binding      |
| ZNF292 | 23036  | zinc finger protein 292(ZNF292)                                   | 12,6 | 4,5 | 21,4 | 194 | 62,8 | 62,8 | 48   | 13,3 | 5,2  | 23,9 | 169 | 54,7 | 54,7 | 58,8 | nucleic acid binding      |
| ZNF416 | 55659  | zinc finger protein 416(ZNF416)                                   | 9,7  | 4,2 | 17,5 | 158 | 51,1 | 51,1 | 63,7 | 17,2 | 5,8  | 31,4 | 196 | 63,4 | 63,4 | 60,8 | nucleic acid binding      |
| ZNF431 | 170959 | zinc finger protein 431(ZNF431)                                   | 12,6 | 5,8 | 20,4 | 24  | 7,8  | 92,2 | 13,7 | 7,4  | 3,9  | 20,1 | 248 | 80,3 | 80,3 | 28,4 | nucleic acid binding      |
| ZNF513 | 130557 | zinc finger protein 513(ZNF513)                                   | 11,3 | 6,5 | 16,8 | 179 | 57,9 | 57,9 | 48   | 12,9 | 6,5  | 18,1 | 212 | 68,6 | 68,6 | 43,1 | skin                      |
| ZNF579 | 163033 | zinc finger protein 579(ZNF579)                                   | 11,7 | 6,5 | 20,4 | 78  | 25,2 | 74,8 | 31,4 | 19,4 | 12,9 | 27,5 | 138 | 44,7 | 44,7 | 71,6 | RNA binding               |
| ZNF688 | 146542 | zinc finger protein 688(ZNF688)                                   | 8,7  | 3,9 | 14,9 | 135 | 43,7 | 56,3 | 49   | 8,7  | 4,2  | 15,9 | 137 | 44,3 | 55,7 | 49   | nucleic acid binding      |
| ZNF784 | 147808 | zinc finger protein 784(ZNF784)                                   | 16,2 | 6,5 | 23,9 | 175 | 56,6 | 56,6 | 53,9 | 17,3 | 7,4  | 24,6 | 196 | 63,4 | 63,4 | 53,9 | immune system process     |
| ZNF839 | 55778  | zinc finger protein 839(ZNF839)                                   | 12,6 | 7,8 | 19,7 | 152 | 49,2 | 50,8 | 55,9 | 18,1 | 12,5 | 26,6 | 113 | 36,6 | 36,6 | 77,5 | lung                      |
| ZPR1   | 8882   | ZPR1 zinc finger(ZPR1)                                            | 8,4  | 4,2 | 19,1 | 183 | 59,2 | 59,2 | 52,9 | 7,8  | 2,6  | 17,2 | 219 | 70,9 | 70,9 | 43,1 | apoptotic process         |

Performance of IgG autoantibodies to diagnose rheumatoid arthritis at 2 years follow-up. Sensitivity at 90% specificity (Sens 90% Spec) with 95% confidence intervals (2.5-CI, 97.5-CI) along with the number of positives (n and %) within the cohort are indicated. Additionally, sensitivity and specificity at an optimal cut-off (Sens (opt), Spec (opt)) according to Youden (maximum value for sensitivity + specificity - 1 at a given cut-off) is indicated. All values are given for uncitrullinated and citrullinated proteins.
